# Supplementary material for: Neutrophil extracellular trap burden correlates with the stenosis of coronary atherosclerosis
Source: PeerJ. 2023 Jun 6;11:e15471. doi: 10.7717/peerj.15471 (PMC10252804; doi:10.7717/peerj.15471)
Supplement: Data S1 [file peerj-11-15471-s001.xlsx]

## Sheet: Control
Gender	Age	BMI	Hypertension	Diabetes	Smoking	Alcoholism	Stent	White blood cell count（10＾9/L）	Neutrophil absolute value（10＾9/L）	Hemoglobin（g/L)	Platelet count（10＾9/L）	Uric acid (ｕmol/L)	Glucose（mmol/L)	TC（mmol/L)	TG（mmol/L)	HDL-C（mmol/L)	LDL-C（mmol/L)	Apolipoprotein A (g/L)	Apolipoprotein B (g/L)	D-dimer	Mild stenosis	Moderate stenosis	Severe stenosis	Angiographic score
F	60	BMI	0	0	0	1	0	4.51	2.54	163	158	201.2	6.45	4.76	0.51	1.6	2.35	1.34	0.74	1.59	——	——	——	——
F	63	BMI	0	0	1	0	0	4.5	2.93	134	173	362.7	6.12	4.42	1.28	1.3	2.26	1.05	0.74	1.07	——	——	——	——
F	64	BMI	0	0	0	0	0	8.52	4.77	145	291	234.2	9.61	3.29	2.57	1.02	1.85	1.01	0.68	0.18	——	——	——	——
F	55	BMI	0	0	0	0	0	6.91	3.8	138	228	236.9	5.4	4.68	2.48	1.09	2.8	1.1	0.92	0.28	—	—	—	—
F	53	BMI	0	0	0	0	0	5.85	2.76	139	215	256.7	5.34	5.47	2.36	0.99	3.6	0.83	1.2	0.49	——	——	——	——
F	70	BMI	0	0	0	0	0	6.85	4.06	141	186	373.7	8.37	4.7	2.15	1.23	2.68	1.05	0.9	0.34	——	——	——	——
F	63	BMI	0	0	0	0	0	5.21	3.04	139	230	340	6.93	5.15	1.98	1.12	3.24	1.19	1.05	1.56	——	——	——	——
F	59	BMI	0	0	0	0	0	5.5	2.76	141	184	259.3	5.24	4.64	1.94	0.94	3.07	0.83	1.07	0.33	——	——	——	——
F	66	BMI	0	0	0	0	0	8.96	3.9	143	198	554	5.81	4.22	1.78	1.21	2.37	1.08	0.84	0.34	——	——	——	——
F	74	BMI	0	0	0	0	0	4.91	2.63	149	145	415.7	5.34	3.81	1.73	1.26	1.95	1.1	0.67	0.41	——	——	——	——
F	34	BMI	0	0	0	0	0	5.61	3.41	168	301	316	6.03	3.78	1.6	1.05	2.18	1.17	0.72	0.18	——	——	——	——
F	80	BMI	0	0	0	0	0	4.31	3	142	150	425.4	5.52	4.51	1.47	0.8	2.71	0.89	0.92	3.71	——	——	——	——
F	58	BMI	0	0	0	0	0	5.55	3.06	152	218	310.5	5.46	4.97	1.4	1.3	2.95	1.14	0.98	0.36	——	——	——	——
F	38	BMI	0	0	0	0	0	6.87	4.3	167	251	322.7	6.51	5.22	1.31	1.06	3.32	1.01	1.1	0.16	——	——	——	——
F	61	BMI	0	0	0	0	0	6.79	4.1	141	320	263	5.51	5.4	1.29	1.52	2.78	1.37	0.87	0.27	——	——	——	Coronary angiography
F	71	BMI	0	0	0	0	0	7.89	5.07	134	332	541	9.92	4.65	1.25	1.25	2.61	1.11	0.89	0.9	——	——	——	——
F	83	BMI	0	0	0	0	0	4.45	2.26	85	283	463	4.88	4.37	1.21	0.84	2.83	0.82	0.92	6.85	——	——	——	——
F	44	BMI	0	0	0	0	0	5.79	3.55	135	303	154.3	5.13	4.62	1.16	1.41	2.84	1.24	0.88	0.2	——	——	——	——
F	55	BMI	0	0	0	0	0	5.94	3.92	134	190	296.7	4.71	4.94	1.15	1.4	2.75	2.75	0.92	——	0	0	0	——
F	46	BMI	0	0	0	0	0	4.39	2.34	131	251	229	5.17	4.81	1.12	1.26	2.69	1.21	0.93	0.13	——	——	——	——
F	52	BMI	0	0	0	0	0	5.92	2.62	131	241	250	5.35	3.83	1.12	1.11	2.13	1.12	0.71	0.28	——	——	——	——
F	76	BMI	0	0	0	0	0	6.95	4.45	93	153	300.3	4.83	3.9	1.12	1.32	2.25	1.06	0.74	0.25	——	——	——	——
F	55	BMI	0	0	0	0	0	4.5	2.27	124	204	235.9	5.64	4.26	1.11	1.5	1.96	1.29	0.65	0.19	——	——	——	——
F	83	BMI	0	0	0	0	0	5.51	3.4	137	173	326	5.95	5.06	1.07	1.56	2.54	1.35	0.84	2.26	——	——	——	——
F	58	BMI	0	0	0	0	0	3.4	1.78	135	262	250.4	5.04	4.59	1.06	1.01	2.85	0.96	0.98	0.34	——	——	——	——
F	48	BMI	0	0	0	0	0	6.72	3.93	137	291	235	4.96	4.68	0.84	1.47	2.38	1.39	0.79	0.14	——	——	——	——
F	34	BMI	0	0	0	0	0	6.52	3.05	112	284	225.9	5.05	4.17	0.8	1.21	2.36	1.14	0.73	0.2	——	——	——	——
F	55	BMI	0	0	0	0	0	4.98	2.54	143	213	304	4.96	4.49	0.75	1.25	2.82	1.5	0.84	——	0	0	0	——
F	30	BMI	0	0	0	0	0	5.34	2.82	117	299	241	4.62	4.26	0.68	1.51	1.96	1.25	0.64	0.31	——	——	——	——
M	53	BMI	0	0	1	1	0	4.8	3.7	140	167	379.9	4.8	3.87	2.66	1.02	2.27	1.09	0.8	0.1	0	0	0	——
M	56	BMI	0	0	1	1	0	5.06	2.72	154	180	384.8	5.47	4.78	1.19	1.32	2.77	1.22	0.95	0.23	——	——	——	——
M	87	BMI	0	0	1	1	0	5.71	3.49	139	218	471.5	5.19	5.08	1.09	1.15	3.11	1	1.05	0.47	——	——	——	——
M	55	BMI	0	0	1	1	0	3.56	1.79	145	283	285.2	4.59	3.8	0.74	1.3	2.09	1.11	0.68	0.55	——	——	——	——
M	43	BMI	0	0	0	1	0	4.92	3.12	135	103	613.9	5.01	3.65	0.91	0.75	2.54	0.74	0.83	1.95	——	——	——	——
M	70	BMI	0	0	0	1	0	1.55	1.04	135	36	508.2	5.08	2.41	0.83	0.72	1.45	0.66	0.49	0.57	——	——	——	——
M	58	BMI	0	0	0	1	0	4.95	2.22	182	268	466.6	4.94	3.48	0.7	0.9	2.07	0.85	0.71	——	——	——	——	——
M	58	BMI	0	0	1	0	0	7.44	4.4	179	208	247.3	6.97	4.84	1.93	1.05	3.12	1.02	0.95	0.18	——	——	——	——
M	63	BMI	0	0	1	0	0	6.62	3.95	148	236	203.1	8.36	5.18	1.76	1.6	2.66	1.36	0.89	0.19	——	——	——	——
M	58	BMI	0	0	0	0	0	5.24	3.25	144	183	405	6.09	5.33	5.04	1.6	2.85	1.57	0.99	0.07	——	——	——	——
M	62	BMI	0	0	0	0	0	5.86	3.22	154	197	358.5	5.53	4.99	4.16	0.81	3.06	0.82	1.02	0.2	——	——	——	——
M	68	BMI	0	0	0	0	0	7.5	3.79	157	233	494.1	5.89	5.46	3.52	0.96	3.57	0.98	1.16	——	——	——	——	——
M	65	BMI	0	0	0	0	0	8.33	5.38	160	149	515.1	5.08	4.41	2.92	0.97	2.6	0.92	0.84	0.24	——	——	——	——
M	63	BMI	0	0	0	0	0	7.14	5.8	119	642	362.3	5.08	2.32	2.65	0.53	1.45	0.64	0.44	0.13	——	——	——	——
M	59	BMI	0	0	0	0	0	8.44	4.93	——	284	182	6.23	4.4	2.31	0.93	2.65	0.97	0.93	0.13	——	——	——	——
M	63	BMI	0	0	0	0	0	6.55	3.47	126	168	414	6.03	3.49	1.67	0.91	2.07	1.01	0.73	0.2	——	——	——	——
M	83	BMI	0	0	0	0	0	6.13	3.59	149	324	665.1	4.33	4.28	1.44	0.88	2.6	0.85	0.87	1.76	——	——	——	——
M	91	BMI	0	0	0	0	0	6.83	3.56	144	149	559.5	5.43	3.01	1.37	0.75	1.82	0.82	0.61	4	——	——	——	——
M	64	BMI	0	0	0	0	0	5.27	2.68	153	164	492	5.67	4.82	1.34	1.06	2.86	1.07	0.89	0.18	——	——	——	——
M	57	BMI	0	0	0	0	0	4.71	2.36	153	166	343.2	5.25	5.47	1.21	0.92	3.65	0.99	1.18	0.27	——	——	——	——
M	38	BMI	0	0	0	0	0	4.71	2.41	159	218	281.3	5.43	4.47	1.19	1.35	2.7	1.02	0.86	0.14	——	——	——	——
M	32	BMI	0	0	0	0	0	6.33	3.49	153	182	297.5	4.55	4.06	0.93	1.1	2.35	1.2	0.78	0.16	——	——	——	——
M	45	BMI	0	0	0	0	0	5.82	2.58	137	169	229.5	5.03	3.87	0.78	1	2.33	0.81	0.65	0.14	——	——	——	——
M	58	BMI	0	0	0	0	0	4.03	2.35	146	240	370.2	5.6	4.4	0.77	1.82	1.8	1.47	0.61	0.11	——	——	——	——
M	57	BMI	0	0	0	0	0	6.42	2.75	145	233	322.1	5.03	3.03	0.64	0.61	1.95	0.59	0.63	0.29	——	——	——	——
M	73	BMI	0	0	0	0	0	3.69	2.36	135	91	746	5.06	2.44	0.61	0.83	1.22	0.91	0.47	0.4	——	——	——	——
29			0	0	8	8	0	5.75927	3.26291	141.5	222.145	354.953	5.66491	4.34527	1.53909	1.13509	2.52164	1.09164	0.834	0.70549
								1.41738	0.943015	17.1351	84.5091	129.062	1.12974	0.769793	0.89339	0.279801	0.530408	0.314123	0.172193	1.21189
								6.16482	3.41286	147.589	235.518	345.08	5.66582	5.09286	1.80071	1.19286	3.13446	1.19732	1.01286	0.295185
								6.49952	3.73111	141.016	230.778	336.968	5.84311	5.15889	1.85937	1.18841	3.19587	1.17873	1.25032	0.505238
								6.894	4.06785	143.365	243.8	352.768	6.6246	5.19631	2.06438	1.23477	3.16615	1.12862	1.01677	0.436719
								White blood cell count（10＾9/L）	Neutrophil absolute value（10＾9/L）	Hemoglobin（g/L)	Platelet count（10＾9/L）	Uric acid (ｕmol/L)	Glucose（mmol/L)	TC（mmol/L)	TG（mmol/L)	HDL-C（mmol/L)	LDL-C（mmol/L)	Apolipoprotein A (g/L)	Apolipoprotein B (g/L)	D-dimer

## Sheet: Mild
Gender	Age	BMI	Hypertension	Diabetes	Smoking	Alcoholism	Stent	White blood cell count（10＾9/L）	Neutrophil absolute value（10＾9/L）	Hemoglobin（g/L)	Platelet count（10＾9/L）	Uric acid (ｕmol/L)	Glucose（mmol/L)	TC（mmol/L)	TG（mmol/L)	HDL-C（mmol/L)	LDL-C（mmol/L)	Apolipoprotein A (g/L)	Apolipoprotein B (g/L)	D-dimer	Mild stenosis	Moderate stenosis	Severe stenosis	Angiographic score	Myobridge	Index 1	Index 2
F	61	BMI	0	0	0	0	0	4.3	2.49	121	258	282	5.4	4.06	1.28	1.41	2.01	1.44	0.67	0.15	1	0	0	——	0	1	1
F	48	BMI	0	0	0	0	0	6.81	3.62	116	271	349.3	5.71	4.84	1.74	1.23	3.02	1.24	0.98	0.18	1	0	0	——	0	1	1
F	62	BMI	0	0	0	0	0	5.97	3.23	114	307	362.7	5.75	5.26	1.17	1.21	3.15	1.16	1.04	0.25	1	0	0	——	0	1	1
F	75	BMI	0	0	1	0	0	4.54	1.71	163	210	213.2	4.46	4.11	0.68	1.7	1.52	1.39	0.51	0	1	0	0	——	1	1	1
F	60	BMI	0	1	0	0	0	4.48	2.04	147	218	252	5.18	6.36	1.58	1.34	4.27	1.27	1.33	0.21	1	0	0	——	1	1	1
F	58	BMI	0	0	0	0	0	3.51	1.52	165	209	262.7	5.82	4.62	1.57	1.2	2.65	1.3	0.87	0.28	1	0	0	——	0	1	1
F	62	BMI	0	0	0	0	0	3.39	1.93	137	175	355.5	5.6	6.53	1.58	1.39	4.2	1.42	1.4	0.17	1	0	0	0	0	1	1
F	54	BMI	0	0	0	0	0	5.08	3.05	158	201	270.3	7.62	6.38	1.51	1.7	3.75	1.61	1.22	0.11	1	0	0	0	1	1	1
F	62	BMI	1	0	0	0	0	6.34	3.74	146	241	338.8	5.56	5.22	1.11	1.4	3.19	1.4	1.03	0.45	1	0	0	0	0	1	1
F	65	BMI	0	0	0	0	0	4.36	2.35	141	273	246.1	5.59	4.97	1.77	1.09	3.2	1.1	1.07	0.38	1	0	0	0	1	1	1
F	42	BMI	0	1	0	0	0	7.22	4.53	140	369	——	——	4.46	1.75	1.09	3.09	1.16	0.99	1.86	1	0	0	——	0	1	1
F	63	BMI	1	0	0	0	0	5.49	2.69	152	290	363.2	4.9	5.28	1.61	1.26	3.3	1.2	1.1	0.47	1	0	0	——	1	1	1
F	60	BMI	0	0	0	0	0	6.27	2.91	158	214	236	4.69	6.45	2.33	1.13	4.37	1.46	1.33	0.16	1	0	0	——	0	1	1
F	54	BMI	0	0	0	0	0	4.46	2.29	154	218	305.9	4.99	6.27	1.59	1.21	4.06	1.32	1.34	0.2	1	0	0	——	1	1	1
F	57	BMI	0	0	0	0		5.63	3.27	161	218	328.5	5.99	4.33	1	1.3	2.49	1.44	0.79	0.18	1	0	0	——	0	1	1
F	58	BMI	0	0	0	0	0	6.03	3.63	139	246	297	5.51	6.75	3.45	1.08	4.42	1.18	1.42	0.16	1	0	0	——	1	1	1
F	52	BMI	0	0	0	0	0	8.69	3.92	130	261	381.3	5.77	7.34	2.61	1.32	5.12	1.2	1.65	0.21	1	0	0	——	1	1	1
F	68	BMI	0	0	0	0	0	5.75	3.08	156	241	345	4.92	5.45	1.69	1.16	3.49	1.41	1.03	0.22	1	0	0	——	1	1	1
F	58	BMI	0	0	0	0	0	5.38	2.97	142	217	445.4	5.48	5.01	1.48	1.4	2.86	1.44	0.93	0.19	1	0	0	——	0	1	1
F	58	BMI	0	0	0	0	0	7.4	4.44	151	214	341	5.29	5.06	2.56	1.02	3.26	1.07	1.08	0.3	1	0	0	——	1	1	1
F	58	BMI	0	0	0	0	0	7.4	4.44	161	214	341	5.29	5.06	2.56	1.02	3.26	1.07	1.08	0.3	1	0	0	——	1	1	1
F	62	BMI	1	0	0	0	0	5.09	2.8	137	303	411.5	5.01	5.32	2.15	1.05	3.52	1.08	1.16	0.57	1	0	0	——	1	1	1
F	48	BMI	0	0	1	0	0	5.91	3.3	161	239	539	4.84	5.06	1.7	1.21	3.4	1.06	1.07	0.1	1	0	0	——	1	1	1
F	62	BMI	1	0	0	0	0	5.09	2.8	142	303	411.5	5.01	5.32	2.15	1.05	3.52	1.08	1.16	0.57	1	0	0	——	1	1	1
F	58	BMI	1	0	0	0	0	5.48	3.07	160	288	531.8	5.42	6.27	1.82	1.6	4.16	1.17	1.24	0.33	1	0	0	——	0	1	1
F	61	BMI	0	0	0	0	0	6.46	2.91	160	276	206.5	6.72	3.33	2.96	0.98	1.59	0.91	0.53	0.2	1	0	0	——	0	1	1
F	61	BMI	1	0	0	0	0	7.27	4.62	132	155	314	5.91	5.89	3.14	1.14	2.51	1.18	0.78	0.25	1	0	0	——	1	1	1
F	59	BMI	0	0	0	0	0	7.2	4.23	168	307	185	5.68	5.21	4.39	0.96	3.14	0.98	1.03	0.21	1	0	0	——	0	1	1
F	60	BMI	1	0	0	0	0	6.36	2.87	166	178	249.4	4.84	5.09	1.04	1.45	2.95	1.11	1	0.15	1	0	0	——	1	1	1
F	70	BMI	1	1	1	0	1	8.98	4.93	162	210	309	7.47	4.97	1.48	1.09	3.15	1.23	1.03	0.95	1	0	0	——	0	1	1
M	66	BMI	0	0	1	1	0	5.97	4.1	157	145	301	5.21	3.78	1.39	1	2.03	1.09	0.72	0.55	1	0	0	——	1	1	1
M	62	BMI	1	0	1	1	0	6.53	4.21	153	209	438.5	6.42	4.63	1.61	0.95	3.03	0.93	0.98	0.9	1	0	0	——	1	1	1
M	55	BMI	0	0	0	1	0	8.04	4.21	127	219	398	6.16	5.49	0.89	1.19	3.12	1.2	1.04	0.12	1	0	0	——	1	1	1
M	65	BMI	0	0	0	0	0	5.38	2.38	148	235	311.1	5.54	5.66	1.65	1	3.89	1.06	1.27	0.35	1	0	0	0	1	1	1
M	66	BMI	0	0	1	0	0	4.91	3.37	156	209	408.3	6.65	5.46	1.78	1.3	3.55	1.19	1.08	0.36	1	0	0	——	1	1	1
M	48	BMI	0	0	0	0	0	5.72	3.28	135	263	466.6	5.1	4.84	1.11	1.2	3.36	1.01	1.05	0.15	1	0	0	——	1	1	1
M	52	BMI	0	0	0	0	1	6.89	2.99	166	293	421	5.51	4.86	0.87	1.4	2.67	1.45	0.81	0.1	1	0	0	——	0	1	1
M	59	BMI	0	1	0	0	0	7.99	5.76	141	200	284	9.63	5.34	4.03	0.85	3.29	1.26	0.99	——	1	0	0	——	1	1	1
M	45	BMI	0	0	0	0	0	5.5	2.3	136	190	309.9	4.84	5.18	1.22	1.28	3.2	1.21	1.05	0.11	1	0	0	——	1	1	1
M	47	BMI	1	0	0	0	0	6.64	4.72	151	253	370	4.37	4.36	1.94	1.08	2.7	1.2	0.91	0.1	1	0	0	——	1	1	1
M	53	BMI	0	0	0	0	0	7.45	3.72	149	266	370.4	5.11	4.8	0.98	1.21	3.05	1.27	0.98	0.31	1	0	0	——	0	1	1
M	64	BMI	1	0	0	0	0	5.33	2.84	172	147	393.5	5.89	4.53	1.13	1.1	2.75	1.21	0.95	0.27	1	0	0	——	1	1	1
M	34	BMI	0	0	0	0	0	4.55	2.72	171	171	286.8	4.75	5.14	0.96	1.2	3.12	1.34	1.03	——	1	0	0	——	1	1	1
M	39	BMI	1	0	0	0	0	8.26	5.47	128	221	365.8	5.2	4.66	1.92	1.21	2.75	1.41	0.9	0.17	1	0	0	——	1	1	1
M	49	BMI	1	0	0	1	0	6.85	3.63	131	261	482	5.53	4.69	2.29	0.94	3.01	1.32	0.92	0.11	1	0	0	——	1	1	1
M	56	BMI	0	0	1	1	0	6.12	3.59	127	404	411	5.08	5.44	0.86	1.28	3.52	1.18	1.01	0.17	1	0	0	——	0	1	1
M	44	BMI	1	0	0	0	0	7.36	3.44	132	191	435	8.32	4.36	5.25	0.99	2.58	0.88	0.82	0.12	1	0	0	——	1	1	1
M	76	BMI	0	0	0	0	0	5.66	2.46	151	177	346.9	5.17	5.21	1.01	1.2	3.29	1.13	1.08	0.16	1	0	0	——	0	1	1
M	71	BMI	1	0	0	0	0	4.43	2.44	153	223	241	6.63	6.57	2.88	1.33	4.23	1.07	1.4	0.91	1	0	0	——	1	1	1
M	62	BMI	0	0	0	0	0	5.95	3.32	134	167	332.9	4.77	4.99	1.05	1.51	2.97	1.04	0.88	0.18	1	0	0	——	1	1	1
M	49	BMI	1	0	0	1	0	6.85	3.63	160	261	482	5.53	4.69	2.29	0.94	3.01	1.32	0.92	0.11	1	0	0	——	1	1	1
M	54	BMI	0	0	0	0	0	4.85	2.41	123	225	230.8	4.59	4.4	1.13	1.3	2.48	1.13	0.85	0.15	1	0	0	——	1	1	1
M	39	BMI	0	0	0	0	0	8.12	4.59	184	312	469.8	4.55	3.9	1.93	0.82	2.46	0.96	0.87	0.13	1	0	0	——	0	1	1
M	54	BMI	1	0	0	0	1	7.39	4.25	157	185	402.5	5.14	4.56	1.27	1.45	2.32	1.26	0.78	0.21	1	0	0	——	0	1	1
M	59	BMI	1	1	1	0	0	7.05	4.44	151	205	237	8.1	3.85	0.9	1.01	2.33	1.02	0.81	0.21	1	0	0	——	0	1	1
M	52	BMI	0	0	0	1	0	9.1	5.47	132	233	309	7.41	3.54	1.05	0.87	2.2	0.83	0.76	0.23	1	0	0	——	1	1	1
30：26F：M			18	5	8	7	3	6.16482	3.41286	147.589	235.518	345.08	5.66582	5.09286	1.80071	1.19286	3.13446	1.19732	1.01286	0.295185	1	0	0	0	0.625	1	1
			38
								6.49952	3.73111	141.016	230.778	336.968	5.84311	5.15889	1.85937	1.18841	3.19587	1.17873	1.25032	0.505238
								6.894	4.06785	143.365	243.8	352.768	6.6246	5.19631	2.06438	1.23477	3.16615	1.12862	1.01677	0.436719

## Sheet: Moderate
Gender	Age	BMI	Hypertension	Diabetes	Smoking	Alcoholism	Stent	White blood cell count (10＾9/L）	Neutrophil absolute value（10＾9/L）	Hemoglobin（g/L)	Platelet count（10＾9/L）	Uric acid (ｕmol/L)	Glucose（mmol/L)	TC（mmol/L)	TG（mmol/L)	HDL-C（mmol/L)	LDL-C（mmol/L)	Apolipoprotein A (g/L)	Apolipoprotein B (g/L)	D-dimer	Mild stenosis	Moderate stenosis	Severe stenosis	Angiographic score	Myobridge	Index 1	Index 2
F	80	BMI	0	0	0	0	1	6.4	4.24	135	150	501.7	5.5	4.82	1.69	1.32	2.9	1.59	0.96	0.3	2	0	0	——	1	2	2
F	44	BMI	0	0	0	1	0	6.93	4.05	166	283	314	4.96	5.02	1.96	1.18	3.16	1.04	14.1	0.17	1	1	0	——	1	2	2
F	56	BMI	1	1	1	0	0	7.59	6	136	123	353.5	5.72	4.36	2.53	0.94	2.65	1.11	0.87	0.1	0	1	0	Angiographic result	0	1	1
F	61	BMI	1	0	1	0	0	5.83	2.59	156	319	344.4	5.92	5.9	1.95	1.25	3.81	1.3	1.27	1.04	2	0	0	——	1	2	2
F	69	BMI	0	0	1	0	0	6.71	4.25	132	155	353.3	5.64	5.14	1.18	1.23	3.16	1.09	1.03	2.95	2	0	0	——	0	2	2
F	65	BMI	1	1	0	0	0	10.3	6.14	138	189	304.8	4.4	5.41	1.87	1.31	3.16	1.4	1.05	0.21	2	1	0	——	0	3	3
F	60	BMI	1	0	0	0	0	10.11	6.13	157	195	513.4	6.39	5.24	3.24	1.11	3.35	1.29	1.1	0.53	2	2	0	——	1	4	4
F	69	BMI	1	0	0	0	0	4.77	1.94	145	208	218.8	5.19	4.37	1.05	1.57	2.52	1.21	0.92	0.25	1	2	0	——	0	3	3
F	53	BMI	1	0	0	0	0	6.89	4.05	154	308	246.9	6.07	6.63	1.51	1.4	4.28	1.33	1.4	0.27	1	2	0	——	1	3	3
F	75	BMI	1	0	0	0	0	8.19	4.52	135	336	307	5.57	8.18	1.58	2.07	4.89	1.73	1.38	0.37	4	1	0	——	1	5	5
F	67	BMI	1	0	0	0	0	9.85	5.78	138	277	367	4.38	4.27	1.93	0.92	2.68	0.96	0.85	0.28	2	1	0	——	0	3	3
F	65	BMI	1	0	0	0	0	4.73	2.46	121	221	293.5	5.53	5.7	2.16	1.21	3.7	1.19	1.21	0.39	2	0	0	0	1	2	2
F	66	BMI	1	0	0	0	0	8.29	5.51	130	288	288.3	5.93	5.39	2.26	1.25	3.32	1.35	1.1	0.41	2	0	0	——	1	2	2
F	68	BMI	1	0	0	0	0	10.11	7.35	123	400	298	7.01	4.66	2.09	1	3.08	1.03	1.02	0.34	2	0	0	——	1	2	2
F	63	BMI	1	0	0	0	0	7.38	3.71	163	211	275.7	5.07	6.6	2.3	1.03	4.45	0.97	1.46	0.31	2	0	0	——	0	2	2
F	79	BMI	1	0	0	0	0	10.49	5.62	137	204	287.1	6	6.44	1.3	1.37	4.21	1.16	1.4	7.71	2	0	0	——	0	2	2
F	70	BMI	1	0	0	0	0	5.47	3.88	125	249	309.3	——	5.86	1.61	1.28	3.57	1.06	1.19	0.26	2	0	0	——	0	2	2
F	59	BMI	1	0	0	0	0	6.12	2.63	174	238	293	5.65	5.58	1.79	1.05	3.46	0.96	1.1	0.3	2	0	0	——	1	2	2
F	70	BMI	0	0	0	0	0	5.98	4.09	88	222	250.2	5.21	5.41	1.06	1.25	3.4	1.41	1.12	0.13	1	2	0	——	0	3	3
F	46	BMI	0	0	0	0	0	7.66	4.74	154	349	288.6	5.12	5.4	6.21	1.05	3.34	0.98	1.1	0.37	2	0	0	——	1	2	2
F	61	BMI	0	0	0	0	0	5.65	3.33	138	238	211.1	5.53	7.28	1.2	1.64	4.74	1.22	1.35	0.29	2	0	0	——	0	2	2
F	51	BMI	0	0	0	0	0	4.98	2.98	134	276	253.7	5.03	6.08	1.42	1.9	3.2	1.83	1.06	0.1	2	0	0	——	0	2	2
F	57	BMI	0	0	0	0	0	6.42	3.45	170	240	265.7	5.28	4.91	1.28	1.2	3.06	1.27	0.99	0.21	2	0	0	0	0	2	2
F	65	BMI	0	0	0	0	0	6.31	3.91	154	288	294.4	6.57	5.08	0.93	1.6	2.72	1.59	0.9	0.26	2	0	0	——	1	2	2
F	53	BMI	0	0	0	0	0	5.21	2.88	125	307	306.5	5.38	4.86	1	1.3	2.97	1.33	0.98	0.12	2	0	0	——	0	2	2
F	54	BMI	0	0	0	0	0	3.09	1.17	126	226	225.6	5.25	6.04	0.74	1.21	4.05	1.28	1.32	0.61	2	0	0	——	0	2	2
F	73	BMI	0	0	0	0	0	7.15	4.77	143	170	218.2	5.35	3.84	0.75	1.32	2.06	1.08	0.67	0.75	2	0	0	——	1	2	2
F	68	BMI	0	0	0	0	0	5.83	3.81	134	344	219.1	5.31	4.16	0.81	1.6	1.85	1.3	0.67	0.47	2	0	0	——	1	2	2
M	66	BMI	1	0	0	0	1	4.69	3.33	146	189	379.4	5.7	4.67	1.14	1.08	2.86	1.04	0.91	0.26	1	1	0	——	0	2	2
M	56	BMI	0	0	0	0	1	7.26	5.72	140	148	280.8	4.93	4.64	1.15	1.3	2.49	1.06	0.81	0.23	2	0	0	——	0	2	2
M	58	BMI	1	1	1	1	0	6.01	3.57	154	200	210.5	7.03	3.33	1.23	1.01	1.95	1.14	0.68	0.12	3	1	0	0	1	4	4
M	60	BMI	1	0	1	1	0	9.56	6.44	141	188	346	6.29	4.83	1.18	1.27	2.93	1.24	0.87	0.15	2	0	0	——	0	2	2
M	60	BMI	0	0	1	1	0	9.22	5.01	126	238	332.2	5.31	4.59	2.61	1.06	2.7	1	0.88	0.96	2	2	0	——	0	4	4
M	49	BMI	0	0	1	1	0	6.83	2.37	146	319	314.7	4.75	5.56	2.75	1.4	3.32	1.26	1.1	0.1	0	1	0	——	0	1	1
M	62	BMI	0	0	1	1	0	6.09	3.4	153	198	312	5.16	4.73	1.83	1.05	3.14	1.12	1.01	0.27	0	1	0	——	1	1	1
M	49	BMI	0	0	1	1	0	7.14	3.56	135	333	314.7	4.75	5.56	2.75	1.4	3.32	1.26	1.1	0.1	0	1	0	——	0	1	1
M	58	BMI	1	1	1	0	0	8.17	4.43	132	263	445.9	7.34	5.56	2.34	1.18	3.5	1.03	1.16	0.15	4	1	0	——	0	5	5
M	65	BMI	1	0	1	0	0	8.09	3.73	138	213	546	5.59	5.6	3.29	1	3.65	0.98	1.22	0.3	4	1	0	——	1	5	5
M	61	BMI	0	0	1	0	0	4.88	2.44	142	147	427.6	5.65	4.73	1.32	0.89	3.04	0.87	0.97	0.16	2	1	0	——	1	3	3
M	54	BMI	0	0	1	0	0	4.72	2.54	137	207	446	4.65	5.04	1.29	0.94	3.34	1.19	1.06	0.24	2	0	0	——	1	2	2
M	67	BMI	0	0	1	0	0	4.02	2.32	115	245	402.3	4.99	4.97	0.76	1	3.01	0.95	0.89	1.44	2	0	0	——	1	2	2
M	57	BMI	0	1	0	0	0	3.99	2.06	149	195	306	10.07	4.46	2.31	0.82	2.86	1	0.97	0.2	2	0	0	——	0	2	2
M	56	BMI	0	1	0	0	0	5.55	3.18	157	146	331	15.84	5.47	3.24	0.94	3.38	1.25	1.28	0.09	2	0	0	0	1	2	2
M	65	BMI	1	0	0	0	0	4.86	2.86	144	237	340.4	5.4	5.79	1.15	1.32	3.65	1.35	1.2	0.25	3	2	0	——	1	5	5
M	77	BMI	1	0	0	0	0	6.05	3.29	129	193	622.2	6.23	5.28	2.42	0.97	3.52	1	1.17	0.37	4	1	0	——	1	5	5
M	39	BMI	1	0	0	0	0	7.97	5.06	142	158	469	5.63	4.02	1.51	0.89	2.63	1.15	0.86	0.1	2	1	0	——	0	3	3
M	63	BMI	1	0	0	0	0	7.07	3.55	139	192	365	4.74	3.92	1.02	1.25	2.11	1.52	0.68	0.22	2	1		——	1	3	3
M	46	BMI	1	0	0	0	0	6.25	2.94	137	258	426.1	5.58	5.93	6.11	0.99	3.77	0.87	1.25	0.1	2	0	0	——	0	2	2
M	41	BMI	1	0	0	0	0	5.75	3.41	119	195	230	——	3.51	1.32	0.94	2.02	1.13	0.72	0.1	2	0	0	——	1	2	2
M	52	BMI	1	0	0	0	0	6.17	2.28	139	217	243.5	4.72	5.15	0.83	1.3	3.19	1.32	1.05	0.22	2	0	0	——	1	2	2
M	62	BMI	0	0	0	0	0	5.84	2.39	143	171	359.6	5.62	5.51	1.34	1.01	3.75	1.05	1.22	0.27	3	2	0	——	0	5	5
M	71	BMI	0	0	0	0	0	5.84	2.66	166	183	366.8	5.29	4.57	1.47	0.93	2.73	0.91	0.91	0.1	3	2	0	——	1	5	5
M	42	BMI	0	0	0	0	0	6.67	4.11	157	215	237.2	5.09	4.88	0.83	1.3	2.96	1.27	0.98	0.13	2	1	0	0	0	3	3
M	65	BMI	0	0	0	0	0	5.2	2.6	134	249	342.5	5.36	6.3	1.24	1.4	4.47	1.18	1.33	0.28	2	1	0	——	0	3	3
M	62	BMI	0	0	0	0	0	6.13	3.2	135	229	440.9	5.13	5.62	1.4	1.14	3.65	1.01	1.2	0.52	0	1	0	——	0	1	1
M	84	BMI	0	0	0	0	0	3.92	2.81	119	58	425.4	4.96	3.78	2.51	1.04	1.95	1.03	0.66	3.09	2	0	0	——	1	2	2
M	61	BMI	0	0	0	0	0	7.22	4.44	131	236	613.1	4.61	6.79	2.91	1.24	4.44	1.11	1.23	0.57	2	0	0	——	1	2	2
M	44	BMI	0	0	0	0	0	5.14	3.04	139	283	413.3	4.81	4.85	3.86	1.09	3.11	1.11	1.09	0.06	2	0	0	——	1	2	2
M	51	BMI	0	0	0	0	0	5.01	2.89	161	364	278.6	5.72	5.67	1.72	1.28	3.68	1.27	1.18	0.08	2	0	0	——	0	2	2
M	51	BMI	0	0	0	0	0	6.27	3.94	148	200	395.8	5.56	3.82	1.57	1.02	2.3	1.37	0.79	0.14	2	0	0	——	1	2	2
M	58	BMI	0	0	0	0	0	3.96	2.26	151	240	247	10.34	4.54	0.9	1.02	2.85	1.12	1	0.32	2	0	0	——	1	2	2
M	66	BMI	0	0	0	0	0	7.08	3.8	139	231	322.7	5.57	4.59	1.19	0.94	2.85	0.97	0.96	0.16	2	0	0	——	1	2	2
M	55	BMI	0	0	0	0	0	6.41	3.45	170	187	292	9.06	4.12	3.25	0.9	2.48	1.07	0.81	0.48	2	0	0	——	1	2	2
28F			27	6	15	7	3	6.49952	3.73111	141.016	230.778	336.968	5.84311	5.15889	1.85937	1.18841	3.19587	1.17873	1.25032	0.505238				0	0.539683	2.50794	2.50794

## Sheet: Severe
Gender	Age	BMI	Hypertension	Diabetes	Smoking	Alcoholism	Stent	White blood cell count (10＾9/L）	Neutrophil absolute value（10＾9/L）	Hemoglobin（g/L)	Platelet count（10＾9/L）	Uric acid (ｕmol/L)	Glucose（mmol/L)	TC（mmol/L)	TG（mmol/L)	HDL-C（mmol/L)	LDL-C（mmol/L)	Apolipoprotein A (g/L)	Apolipoprotein B (g/L)	D-dimer	Mild stenosis	Moderate stenosis	Severe stenosis	Angiographic score	Myobridge	Index 1	Index 2
F	81	BMI	0	0	0	1	0	8.64	4.63		250	481	4.38	4.32	1.79	1.05	2.48	1.1	0.87	0.52	4	2	1	——	——	7	7
F	42	BMI	1	1	1	0	0	11.53	8.12	140	325	289.3	13	4.19	2.69	2.87	5.75	0.5	1.37	——	3	0	2	——	1	5	5
F	68	BMI	0	1	1	0	0	5.34	2.41	163	167	379.9	8.29	5.02	4.23	0.94	3.06	0.98	1.02	0.28	3	0	0	——	1	3	3
F	65	BMI	1	0	1	0	0	5.19	2.73	109	153	389.4	4.89	5.05	2.25	1.04	3.25	0.98	1.07	0.24	1	0	1	——	1	2	2
F	65	BMI	1	0	1	0	0	6.35	4.32	149	159	186.2	——	2.85	1.36	1.14	1.35	1.04	0.46	0.43	1	2	1	Coronary angiography	——	4	4
F	59	BMI	0	0	1	0	0	8.89	5.63	147	342	232.4	5.13	7.39	1.38	1.56	4.97	1.12	1.47	0.28	4	0	0	——	——	4	4
F	57	BMI	0	0	1	0	0	7.05	3.17	175	312	350.7	5.24	5.94	4.2	1.12	4.27	0.92	1.19	0.26	3	0	0	——	1	3	3
F	71	BMI	1	1	0	0	0	15.72	12.04	133	560	766.6	7.82	3.21	3.3	0.79	1.83	1.06	0.65	0.16	4	0	2	——	0	6	6
F	71	BMI	1	1	0	0	0	15.72	12.04	136	560	766.6	7.82	2.94	1.31	0.83	1.73	0.86	0.6	0.16	4	0	2	——	0	6	6
F	55	BMI	1	1	0	0	0	5.93	3.35	156	207	367.2	7.46	4.77	1.49	1.34	2.65	1.21	0.87	0.38	0	0	1	Coronary angiography	0	1	1
F	62	BMI	1	1	0	0	0	7.63	4.61	147	250	305	10.4	4.74	0.83	1.1	2.94	0.98	1	0.22	4	0	0	——	1	4	4
F	63	BMI	1	1	0	0	0	6.72	4.22	132	268	457	9.82	5.01	1.65	1.4	2.8	1.44	0.8	0.23	3	0	0	——	1	3	3
F	66	BMI	1	1	0	0	0	5.41	2.93	161	254	265	5.96	3.92	1.38	1.4	1.8	1.55	0.58	0.72	3	0	0	——	1	3	3
F	58	BMI	0	1	0	0	0	6.73	3.21	132	205	472	6.89	5.67	1.37	1.03	3.83	1.26	1.1	0.25	2	0	1	——	0	3	3
F	63	BMI	0	1	0	0	0	10.19	5.22	138	296	236.8	15.77	6.63	1.74	1.23	4.5	1.14	1.49	0.25	1	1	1	——	0	3	3
F	63	BMI	0	1	0	0	0	10.19	5.22	159	296	236.8	15.77	6.63	1.74	1.23	4.5	1.14	1.49	0.25	1	1	1	——	0	3	3
F	74	BMI	1	0	0	0	0	6	3.4	146	262	375.1	4.6	7.12	1.78	1.26	4.85	1.08	1.62	0.53	4	1	1	——	1	6	6
F	69	BMI	1	0	0	0	0	6.09	2.92	157	256	383.9	4.63	5.56	1.93	1	3.75	0.95	1.23	1.01	3	0	1	Coronary angiography	0	4	4
F	62	BMI	1	0	0	0	0	5.51	2.59	126	212	179.2	4.85	5.39	1.03	1.7	2.74	1.4	0.9	7.4	1	1	1	——	——	3	3
F	66	BMI	1	0	0	0	0	6.87	3.41	117	242	264.5	6.63	4.57	1.58	1.26	2.63	1.16	0.87	0.28	5	0	0	——	1	5	5
F	59	BMI	1	0	0	0	0	6.1	3.83	156	297	271.7	5.56	5.77	1.45	1.12	3.82	1.11	1.21	0.22	4	0	0	0	1	4	4
F	51	BMI	1	0	0	0	0	6.33	4.05	124	264	235.2	4.96	6.99	1.86	1.42	4.56	1.22	1.51	0.34	3	0	0	——	1	3	3
F	71	BMI	1	0	0	0	0	5.77	3.16	164	308	269.1	6.5	7.45	2.06	1.22	5.26	1.04	1.75	0.17	3	0	0	——	1	3	3
F	58	BMI	0	0	0	0	0	4.25	2.35	132	257	289.9	5.15	5.62	2.53	1.38	3.3	1.2	1.1	0.38	1	0	2	——	0	3	3
F	59	BMI	0	0	0	0	0	8.26	3.69	134	257	309.7	——	6.51	2.33	1.34	4.18	1.23	1.18	0.26	1	0	2	——	0	3	3
F	58	BMI	0	0	0	0	0	8.37	5.41	166	331	321.1	5.65	5.92	1.67	1.21	3.95	1.4	1.31	0.22	2	2	1	——	1	5	5
F	70	BMI	0	0	0	0	0	7.48	4.28	133	149	380.6	6.73	5.29	1.43	1.4	2.96	1.49	0.96	0.24	1	0	1	0	1	2	2
F	66	BMI	0	0	0	0	0	7.14	4.09	159	354	374.3	6.44	4.79	2.28	1.04	3.12	1.11	1.02	0.35	1	0	1	——	0	2	2
F	60	BMI	0	0	0	0	0	6.98	3.71	172	337	290	5.25	5.94	1.59	1.13	3.73	1.11	1.17	0.28	4	0	0	——	1	4	4
F	42	BMI	0	0	0	0	0	5.07	2.92	152	212	303.3	5.69	4.66	2.23	1.02	2.76	1.31	0.9	0.14	3	0	0	——	1	3	3
F	59	BMI	0	0	0	0	0	5.46	2.67	154	325	250.1	5.72	7.17	1.48	1.84	4.86	1.68	1.45	0.21	3	0	0	——	1	3	3
M	52	BMI	0	0	1	0	1	6.76	4.01	147	174	348	5.69	3.18	1.7	0.85	1.75	0.98	0.68	0.1	2	1	1	——	1	4	4
M	72	BMI	1	1	1	1	0	6.63	4.22	145	261	634.6	7.44	5.63	1.9	1.02	3.85	1.05	1.26	0.37	4	0	0	——	1	4	4
M	48	BMI	1	0	1	1	0	6.84	4.45	152	216	442	4.78	4.58		0.91	2.7	1.05	0.84	1.05	3	0	1	——	0	4	4
M	48	BMI	1	0	1	1	0	6.84	4.45	153	216	442	4.78	2.91	2.01	0.84	1.51	0.82	0.54	1.05	3	0	1	——	0	4	4
M	60	BMI	1	0	1	1	0	9.56	6.44	135	188	346	6.29	4.83	1.18	1.27	2.93	1.24	0.87	0.15	2	0	1	——	0	3	3
M	59	BMI	1	1	1	0	0	7.03	4.37	150	213	367	14.51	5.19	2.13	0.87	3.44	0.89	1.13	0.4	1	1	4	——	1	6	6
M	58	BMI	1	0	1	0	0	9.31	7.21	133	171	309.8	5.94	4.2	1.66	0.93	2.65	0.95	0.87	0.13	2	0	2	——	——	4	4
M	74	BMI	0	0	1	0	0	6.31	3.76	140	242	315.7	5.09	6.61	2.7	1.22	4.2	1.14	1.23	0.44	3	0	1	——	1	4	4
M	50	BMI	1	1	0	0	0	6.53	3.92	155	159	248.5	9.92	4.81	2.31	1.21	2.91	1.33	1	0.15	2	2	2	——	0	6	6
M	50	BMI	0	1	0	0	0	8.09	4.13	135	221	252.3	6.31	4.51	3.13	0.87	2.2	1.08	0.66	0.15	0	4	1	Angiographic result	0	5	5
M	78	BMI	1	0	0	0	0	6.35	3.73	——	214	464.3	4.61	5.82	1.53	1.24	3.85	0.98	1.27	0.79	2	0	3	——	1	5	5
M	47	BMI	1	0	0	0	0	5.95	3.34	126	221	276.8	5.83	5.85	1.51	0.91	4.08	0.92	1.32	0.28	0	0	2	Angiographic result	——	2	2
M	65	BMI	1	0	0	0	0	5.76	2.73	133	221	465.7	9.37	5.52	1.52	1.09	3.7	1.03	1.23	0.17	5	0	1	——	1	6	6
M	52	BMI	1	0	0	0	0	8.02	4.43	155	177	420.7	5.13	5.01	1.58	1.3	3.5	1.16	1.07	0.23	3	0	1	——	0	4	4
M	59	BMI	1	0	0	0	0	8.2	3.4	152	217	439	4.99	4.63	1.49	1.02	2.85	1.16	0.95	0.21	3	0	1	——	0	4	4
M	59	BMI	1	0	0	0	0	9.88	6.73	142	339	714.6	5.36	4.77	7.86	0.76	2.71	0.74	0.88	0.69	1	2	1	——	——	4	4
M	70	BMI	1	0	0	0	0	6.49	4.39	128	180	363.9	4.58	3.49	0.58	1.21	1.85	1.03	0.59	0.73	4	0	0	Coronary angiography	1	4	4
M	62	BMI	1	0	0	0	0	6.21	3.32	138	189	463.7	6.48	5.18	2.01	1.21	3.06	1.08	1.02	0.38	3	0	0	——	1	3	3
M	62	BMI	0	0	0	0	0	7.42	5.07	134	230	447	5.55	3.34	1.13	1.14	1.73	1.38	0.62	0.39	2	0	4	——	0	6	6
M	63	BMI	0	0	0	0	0	7.08	5.64	138	158	384.6	5.86	4.42	1.92	0.94	2.67	1.07	0.95	0.15	0	1	2	Coronary angiography	1	3	3
M	64	BMI	0	0	0	0	0	4.89	3.27	160	170	234.4	6.81	3.19	1.28	1	1.69	0.95	0.58	0.17	3	1	1	——	1	5	5
M	67	BMI	0	0	0	0	0	6.72	3.81	146	262	304	5.14	5.08	2.09	0.89	3.48	1.1	1.14	0.18	3	0	0	0	0	3	3
M	59	BMI	0	0	0	0	0	5.34	2.42	148	221	310	4.91	5.05	1.02	1.2	3.11	1.16	0.98	0.1	3	0	0	0	0	3	3
M	77	BMI	0	0	0	0	0	7.61	4.79	139	219	493	4.8	4	1.43	0.87	2.54	0.93	0.72	0.26	3	0	0	——	1	3	3
Gender	Age	BMI	Hypertension	Diabetes	Smoking	Alcoholism	Stent	White blood cell count（10＾9/L）	Neutrophil absolute value（10＾9/L）	Hemoglobin（g/L)	Platelet count（10＾9/L）	Uric acid (ｕmol/L)	Glucose（mmol/L)	TC（mmol/L)	TG（mmol/L)	HDL-C（mmol/L)	LDL-C（mmol/L)	Apolipoprotein A (g/L)	Apolipoprotein B (g/L)	D-dimer	Mild stenosis	Moderate stenosis	Severe stenosis	Angiographic score	Myobridge	Index 1	Index 2
390F			31	15	14	5	0	7.29796	4.36537	144.396	249.926	364.559	6.78442	5.08352	1.95887	1.16907	3.23444	1.10907	1.03222	0.469057	2.46296	0.37037	0.962963	0	0.583333	3.7963	3.7963	#DIV/0!	#DIV/0!

## Sheet: White blood cell
Control	White blood cell (Mild)	Moderate	Severe
4.51	4.3	5.84	7.42
4.5	6.81	4.86	7.03
8.52	5.97	5.84	6.35
6.91	4.54	10.11	15.72
5.85	5.97	9.22	15.72
6.85	6.53	4.77	11.53
5.21	8.04	6.89	9.31
5.5	4.48	5.98	6.53
8.96	3.51	6.05	4.25
4.91	3.39	8.19	8.26
5.61	5.08	8.17	5.95
4.31	5.38	8.09	7.08
5.55	6.34	6.01	5.76
6.87	4.36	7.97	6
6.79	7.22	6.67	8.64
7.89	4.91	5.2	6.31
4.45	5.72	10.3	8.02
5.79	5.49	9.85	8.2
5.94	6.89	4.88	6.84
4.39	7.99	6.93	6.84
5.92	6.27	4.69	6.09
6.95	5.5	6.83	4.89
4.5	4.46	6.13	6.73
5.51	6.64	6.09	9.56
3.4	5.63	7.59	6.76
6.72	7.45	7.14	8.37
6.52	6.03	7.07	7.48
4.98	5.33	3.92	7.14
5.34	4.55	7.66	5.19
4.8	8.26	6.25	10.19
5.06	8.69	7.22	10.19
5.71	5.75	5.65	5.51
3.56	6.85	3.99	9.88
4.92	5.38	5.75	6.35
1.55	7.4	4.98	5.93
4.95	7.4	4.73	8.09
7.44	6.12	6.42	6.87
6.62	5.09	5.55	7.63
5.24	5.91	5.14	6.1
5.86	7.36	5.01	6.63
7.5	5.66	6.27	6.49
8.33	5.09	3.96	8.89
7.14	5.48	4.72	6.98
8.44	6.46	5.83	6.33
6.55	7.27	6.17	5.07
6.13	7.2	8.29	6.72
6.83	4.43	6.31	5.34
5.27	5.95	6.4	5.46
4.71	6.85	7.08	6.72
4.71	4.85	5.21	7.05
6.33	6.36	3.09	7.61
5.82	8.12	9.56	5.41
4.03	7.39	4.02	6.21
6.42	7.05	10.11	5.77
3.69	8.98	7.15	5.34
	9.1	7.38
		7.26
		10.49
		5.47
		6.71
		5.83
		6.12
		6.41
5.75927	6.16482
1.41738	1.34093
		6.49952	7.32236
		1.68309	2.21514

## Sheet: Neutrophil
Control	Neutrophil (Mild)	Moderate	Severe
2.54	2.49	2.39	5.07
2.93	3.62	2.86	4.37
4.77	3.23	2.66	3.73
3.8	1.71	6.13	12.04
2.76	4.1	5.01	12.04
4.06	4.21	1.94	8.12
3.04	4.21	4.05	7.21
2.76	2.04	4.09	3.92
3.9	1.52	3.29	2.35
2.63	1.93	4.52	3.69
3.41	3.05	4.43	3.34
3	2.38	3.73	5.64
3.06	3.74	3.57	2.73
4.3	2.35	5.06	3.4
4.1	4.53	4.11	4.63
5.07	3.37	2.6	3.76
2.26	3.28	6.14	4.43
3.55	2.69	5.78	3.4
3.92	2.99	2.44	4.45
2.34	5.76	4.05	4.45
2.62	2.91	3.33	2.92
4.45	2.3	2.37	3.27
2.27	2.29	3.2	3.21
3.4	4.72	3.4	6.44
1.78	3.27	6	4.01
3.93	3.72	3.56	5.41
3.05	3.63	3.55	4.28
2.54	2.84	2.81	4.09
2.82	2.72	4.74	2.73
3.7	5.47	2.94	5.22
2.72	3.92	4.44	5.22
3.49	3.08	3.33	2.59
1.79	3.63	2.06	6.73
3.12	2.97	3.41	4.32
1.04	4.44	2.98	3.35
2.22	4.44	2.46	4.13
4.4	3.59	3.45	3.41
3.95	2.8	3.18	4.61
3.25	3.3	3.04	3.83
3.22	3.44	2.89	4.22
3.79	2.46	3.94	4.39
5.38	2.8	2.26	5.63
5.8	3.07	2.54	3.71
4.93	2.91	2.59	4.05
3.47	4.62	2.28	2.92
3.59	4.23	5.51	3.81
3.56	2.44	3.91	2.42
2.68	3.32	4.24	2.67
2.36	3.63	3.8	4.22
2.41	2.41	2.88	3.17
3.49	2.87	1.17	4.79
2.58	4.59	6.44	2.93
2.35	4.25	2.32	3.32
2.75	4.44	7.35	3.16
2.36	4.93	4.77	2.41
	5.47	3.71
		5.72
		5.62
		3.88
		4.25
		3.81
		2.63
		3.45
3.26291	3.41286	3.73111	4.37018
0.943015	0.969642	1.26129	1.92447

## Sheet: NET-BMI
	MPO	control	Mild	Moderate	Severe			NE	control	Mild	Moderate	Severe		dsDNA	control	Mild	Moderate	Severe		BMI	control	Mild	Moderate	Severe
		70.4	116	77.2	182.4				53.0777	157.182	81.0791	132.178			92.15	104.23	151.48	198.35			21.3382	21.6413	28.7317	26.0375
		85.6	120.8	122.4	274				53.1568	147.182	183.413	132.573			72.93	104.23	151.65	161.18			24.974	23.3726	28.7317	26.8274
		60.8	128	72.8	100.4				53.3941	147.775	113.747	155.829			183.02	138.96	165.85	147.42			22.8624	22.6003	28.8415	26.9896
		78.4	99.2	88	134				53.4732	83.4917	156.145	106.549			73.72	64.55	219.56	236.25			23.0518	21.875	28.9341	26.9896
		72	114	104.8	131.2				84.1244	87.9213	156.303	106.589			88.09	150.98	170.01	197.42			23.833	21.4844	29.0657	27.0416
		82.4	122.4	147.6	132.8				84.1244	140.562	185.113	156.303			74.16	154.21	162.5	183.86			23.833	24.7676	25.6896	21.6713
		62.8	126.4	69.2	190				54.3433	142.223	175.169	172.536			68.87	155.62	166.38	172.2			18.5901	21.4844	25.6896	27.3356
		60.8	92.4	114	194				31.4439	89.3451	109.001	155.829			88.09	81.13	167.88	147.42			20.9572	22.8571	22.3214	22.1003
		88	95.6	156.8	272				54.7784	85.7065	175.423	172.576			169.05	120.15	151.74	247.51			21.3382	24.9135	25.9909	21.875
		94.4	78	122.8	269.6				68.779	89.701	108.448	217.346			70.28	83.53	108.9	247.42			24.8358	25.763	29.4108	27.2392
		62.8	72	146	140				56.8349	90.492	109.001	117.346			70.37	83.86	165.23	147.42			24.6094	23.1481	29.4118	22.4323
		74	83.6	73.2	129.2				57.3491	107.775	175.841	118.533			70.37	122	166.64	237.99			23.8751	21.9138	29.4118	22.6562
		101.6	120.4	106	123.6				127.824	177.107	105.323	121.657			154.12	57.94	153.15	138.52			31.83	28.075	29.7211	22.6562
		95.2	72	117.6	124.8				68.6604	83.808	135.104	125.019			94.3	92.15	176.25	138.61			28.1003	28.7317	29.7458	22.7732
		70	93.2	138.4	107.2				58.1401	112.126	92.5486	161.642			85.62	125.74	125.62	183.28			25.7812	24.4898	30.0838	22.8624
		78.8	91.6	129.2	142.4				52.9986	110.623	173.903	164.213			75.62	92.76	166.99	144.6			26.6728	25.9516	26.7036	22.8624
		108.8	118.4	71.6	140				108.384	86.8139	110.781	166.27			155.62	92.76	237.31	196.01			26.8386	24.8163	26.6436	23.0388
		107.2	95.2	133.2	191.2				94.8575	124.624	177.107	166.27			108.75	81.13	176.25	234.89			28.0404	23.1481	26.5731	23.0469
		99.6	140.8	158.4	153.2				54.8575	114.973	151.755	167.1			60.07	158.03	108.63	181.52			21.875	20.5151	24.0741	23.6244
		118.8	110.4	221.6	147.2				154.937	108.448	153.218	167.1			156.94	183.77	108.9	142.75			22.6562	20.8308	23.6614	23.6614
		80.8	106.8	227.2	126				55.8066	109.041	231.448	106.747			85.82	122.47	75.4	104.16			25.3906	28.3447	30.4438	23.6713
		74	84	115.2	264				56.0044	130.279	69.4909	215.764			71.52	94.3	84.04	244.69			20.9572	29.3848	26.9896	23.6713
		41.2	93.2	143.6	118.4				56.123	84.8363	105.956	107.063			71.52	120.01	156.06	144.78			21.7193	27.4587	26.9896	23.833
		119.2	86	114.4	128				111.879	125.652	66.9993	69.4909			134.46	90.18	90.27	116.1			25.3906	25.9516	30.4688	23.8751
		58.8	111.6	102.4	123.6				65.2195	126.957	74.9884	72.4968			77.16	191.68	100.42	136.36			21.0938	26.2976	27.4286	23.8751
		74	127.6	136.8	125.6				65.3382	45.5237	111.058	128.816			78.4	171.78	167.96	183.23			19.5312	22.8571	27.3797	24.9135
		46	124.8	78	180				65.4569	127.55	111.177	130.042			77.16	159.68	169.37	235.35			20.0433	28.4082	27.3797	25.763
		78	114	137.6	140.8				52.6822	127.985	111.454	130.161			102.98	146.19	170.7	158.07			29.2969	28.7317	30.863	28.075
		40.8	94	128	100				66.406	73.09	212.047	107.182			79.81	122	170.78	159.85			23.4375	26.3656	30.8642	28.7317
		100.8	124.8	122	133.2				82.8404	130.082	183.395	128.104			124.82	158.09	151.48	165.23			25.3906	27.4587	25.5354	24.2215
		114	74	102	163.6				66.2083	132.178	123.319	74.9488			134.84	88.35	124.33	232.08			25.3906	25.6612	28.7317	24.2587
		44.8	80.4	146	100.8				66.2874	73.7623	124.386	127.985			79.72	98.44	150.33	167.79			23.8751	22.8571	28.7317	24.4418
		35.6	122	116.4	123.2				65.9314	161.642	178.016	107.182			77.07	225.18	79.14	191.29			25.7117	28.4082	28.7317	24.4898
		32.8	124.8	173.2	146				69.0164	112.047	159.19	183.474			100.7	103.34	150.42	218.07			26.6728	23.6713	28.089	30.1103
		34.8	131.6	78	102.8				69.0559	111.454	109.041	130.991			108.9	155.61	130.12	145.4			29.1363	23.6713	25.3515	31.25
		106.8	124.4	146	134				70.3215	111.968	157.964	185.768			111.28	65.35	152.71	228.73			23.4375	24.6181	27.0416	32.0513
		124.8	118.8	106.4	108				84.7661	131.94	109.001	111.058			136.76	130.06	143.28	140.55			24.2188	25.6612	27.6817	35.2508
		111.6	78	135.2	114.8				56.2022	92.5486	105.956	208.351			143.61	104.84	150.16	247.42			25.3906	29.4118	25.9516	35.3798
		101.6	98	78	138.4				56.3603	93.0627	105.956	135.935			171.7	105.28	165.32	176.53			22.7732	25.3515	32.0499	24.7721
		103.2	134.4	61.6	108				56.5185	128.816	72.5759	118.414			141.78	156.94	91.44	167.79			22.7732	26.3329	32.112	24.9337
		80.4	134	93.2	160.4				56.6372	174.852	112.126	134.353			72.93	189.56	170.78	167.97			24.974	28.7317	32.4354	25.0593
		90.4	69.2	124.8	142				52.1285	93.9329	112.442	138.624			164.73	78.96	72.02	194.12			25.9695	25.6489	29.0698	31.25
		92.8	99.2	126.4	111.2				68.3045	94.9612	113.233	138.822			87.12	112.16	122.55	184.85			22.4323	25.0135	32.4622	32.0513
		51.6	99.6	230	142.4				68.3045	94.9612	213.906	111.177			188.09	138.96	123.78	135.61			27.3438	24.1633	32.6531	35.2508
		91.2	66	110	134				68.8186	95.238	114.538	189.169			92.15	158.63	175.19	252.89			27.3438	25.1024	30.4498	35.3798
		62	108	100.8	169.2				58.4565	110.227	115.764	133.443			74.6	148.77	175.28	223.25			21.2175	25.7959	27.0416	25.3515
		62.8	114	74	162				45.5632	113.906	93.4828	139.613			55.12	138.78	130.12	196.22			29.2969	25.6896	30.4832	25.3906
		68.4	126	142.4	120.8				61.7392	40.1053	137.24	110.544			77.16	152.39	144.6	128.54			28.578	20.0617	26.8274	25.3906
		114.4	146	80.4	158				109.01	112.64	79.6131	224.171			74.25	138.17	174.6	250.24			27.3438	33.2986	24.6914	25.3934
		74.4	128	100	110.4				61.9369	113.233	142.223	230.103			147.42	111.28	146.1	188.86			25.7117	33.7149	24.1517	32.0499
		76	67.6	73.6	129.2				59.5243	68.1067	146.297	217.724			74.34	75.7	134.35	214.33			25.9107	30.4218	24.6181	32.112
		106	114.4	164	128				65.971	180.626	150.371	120.827			146.1	187.2	147.42	161.09			28.3039	30.7787	23.6713	32.4354
		98	121.2	88	140.8				119.643	71.9035	71.7549	121.657			97.42	65	147.42	198.83			26.7094	26.8519	24.8163	29.0698
		66	81.2	124.8	130				88.1981	124.624	107.775	123.042			84.21	100.19	225.38	152.98			21.4844	29.4078	25.4694	32.4622
		77.6	72.4	114	129.6				88.5145	72.6154	131.782	123.319			85.62	90.55	123.53	151.48			23.0112	30.7958	25.5036	32.6531
			109.2	106						175.169	90.7689					150.07	111.28					31.8339	20.8308
				89.2							97.255						118.07						25.6612
				72.8							77.7964						218.07						26.8274
				76.4							101.724						119.48						27.7551
				72							73.09						120.27						27.7551
				59.2							73.1295						122.65						25.8264
				96.4							74.9488						123.53						25.9516
				100.8							86.0624						140.55						27.3438
		80.1455	105.35	114.889	145.935				69.7584	111.703	124.907	142.182			102.607	122.615	147.05	183.866			24.6028	25.832	27.6277	26.7744
		23.7811	21.3266	37.7256	41.9041				22.3554	31.325	40.066	37.9121			35.8495	38.0478	34.8278	40.0484			2.82151	3.21821	2.5597	4.02666

## Sheet: Total
MPO	wbc	neutrophile coun	BMI	TC	TG	HDL	LDL	NE	GLUO	dsDNA
70.4	4.53	2.27	21.34	3.34	0.49	1.21	1.76	53.08	4.08	154.3
85.6	4.98	2.18	24.97	5.18	0.62	2.1	2.14	53.16	5.19	155.62
60.8	4.54	1.71	22.86	4.11	0.68	1.7	1.52	53.39	4.46	155.62
78.4	5.34	2.82	23.05	4.26	0.68	1.51	1.96	53.47	4.62	155.62
122	7.81	5.13	23.83	4.8	0.73	1.1	3.05	84.12	4.54	148.75
82.4	7.15	4.77	23.83	3.84	0.75	1.32	2.06	84.12	5.35	150.07
112.8	4.98	2.54	18.59	4.49	0.75	1.25	2.82	54.34	4.96	156.94
60.8	3.02	1.38	20.96	4.37	0.78	1.93	1.52	31.44	5.21	125.82
88	5.21	3.1	21.34	4.43	0.78	1.43	2.2	54.78	4.79	68.87
94.4	6.52	3.05	24.84	4.17	0.8	1.21	2.36	68.78	5.05	92.15
62.8	4.45	2.2	24.61	3.81	0.81	1.7	1.57	56.83	5.57	72.93
74	5.83	3.81	23.88	4.16	0.81	1.6	1.85	57.35	5.31	73.02
101.6	4.56	2.58	1.83	5.3	0.82	1.89	2.54	57.82	5.39	73.72
95.2	6.72	3.93	22.1	4.68	0.84	1.47	2.38	68.66	4.96	88.09
70	5.3	2.88	21.72	3.86	0.92	1.58	1.75	58.14	4.77	74.16
78.8	4.65	2.14	20.96	4.01	0.92	1.34	1.97	53	4.68	154.12
108.8	6.31	3.91	21.09	5.08	0.93	1.6	2.72	68.38	6.57	88.09
107.2	4.64	2.25	19.53	5.18	0.94	1.62	2.68	54.86	5.67	69.05
99.6	5.63	3.27	21.88	4.33	1	1.3	2.49	54.86	5.99	70.28
118.8	5.21	2.88	22.66	4.86	1	1.3	2.97	54.94	5.38	70.37
120.8	4.54	2.01	25.39	5.34	1	1.6	3.02	55.81	5.8	70.37
74	5.9	3.48	25.39	3.82	1.04	1.4	1.85	56	4.55	71.52
102	4.39	2.06	25.78	4.51	1.04	1.21	2.55	56.12	6.03	71.52
114	3.4	1.78	26.67	4.59	1.06	1.01	2.85	31.88	5.04	134.46
136	5.98	4.09	26.84	5.41	1.06	1.25	3.4	65.22	5.21	77.16
101.6	5.51	3.4	28.04	5.06	1.07	1.56	2.54	65.34	5.95	78.4
130	7.25	6.47	30.04	5.33	1.07	1.24	3.25	65.46	5.32	77.16
78.4	4.5	2.27	29.3	4.26	1.11	1.5	1.96	52.68	5.64	152.98
85.2	5.92	2.62	23.44	3.83	1.12	1.11	2.13	66.41	5.35	79.81
107.6	4.39	2.34	25.39	4.81	1.12	1.26	2.69	52.84	5.17	64.82
110	5.94	3.92	25.39	4.94	1.15	1.4	2.75	66.21	4.71	78.84
113.6	5.79	3.55	23.88	4.62	1.16	1.41	2.84	66.29	5.13	79.72
118	4.92	3.05	25.71	4.97	1.16	1.23	2.95	65.93	4.95	77.07
126	5.97	3.23	26.67	5.26	1.17	1.21	3.15	69.02	5.75	100.7
126.4	6.71	4.25	22.43	5.14	1.18	1.23	3.16	69.06	5.64	108.9
106.8	6.91	5.44	23.44	4.94	1.21	1.41	2.67	70.32	5.24	111.28
72	3.72	1.22	24.22	3.03	1.23	0.8	1.8	34.77	6.64	136.76
69.6	5.02	2.99	25.39	3.49	1.23	1.3	1.74	56.2	5.1	71.61
101.6	5.05	2.77	22.77	4.54	1.25	1.21	2.54	56.36	5.33	71.7
103.2	4.82	1.82	22.77	4.68	1.26	1.3	2.58	56.52	4.84	71.78
80.4	4.3	2.49	24.97	4.06	1.28	1.41	2.01	56.64	5.4	72.93
90.4	4.5	2.93	25.97	4.42	1.28	1.3	2.26	52.13	6.12	64.73
92.8	5.97	3.4	29.14	4.56	1.28	1.4	2.32	68.3	4.88	87.12
122.4	6.42	3.45	27.34	4.91	1.28	1.2	3.06	68.3	5.28	88.09
132.8	6.87	4.3	27.34	5.22	1.31	1.06	3.32	68.82	6.51	92.15
110	5.19	1.99	31.22	4.65	1.34	1.1	2.75	58.46	4.46	74.6
55.2	4.2	2.21	29.3	3.61	1.38	1.93	1.38	45.56	5.02	55.12
118.4	7.48	4.28	28.58	5.29	1.43	1.4	2.96	61.74	6.73	77.16
114.4	5.38	2.97	27.34	5.01	1.48	1.4	2.86	59.01	5.48	74.25
74.4	7.36	4.19	25.71	3.29	1.49	1.01	1.86	61.94	5.39	147.42
126	5.46	2.29	25.91	5.16	1.55	1.21	3.15	59.52	5.15	74.34
106	3.51	1.52	28.3	4.62	1.57	1.2	2.65	65.97	5.82	146.1
98	4.82	2.02	26.71	3.93	1.59	0.92	2.45	59.64	4.96	147.42
106	9.24	5.23	21.48	4.45	1.62	1.02	2.65	88.2	4.58	154.21
117.6	7.41	4.61	23.01	4.72	1.68	1.12	2.94	88.51	5.22	155.62
116	6.4	4.24	21.64	4.82	1.69	1.32	2.9	90.77	5.5	158.35
120.8	6.81	3.62	23.37	4.84	1.74	1.23	3.02	97.26	5.71	161.18
128	4.36	2.35	22.6	4.97	1.77	1.09	3.2	51.89	5.59	147.42
99.2	6.86	5.1	21.88	4.5	1.79	1.2	2.48	113.75	5.5	176.25
114	4.37	2.01	24.77	4.81	1.81	1.2	2.85	51.22	5.4	147.42
122.4	7.05	3.88	21.48	5.27	1.94	1.4	3.06	62.21	4.98	83.86
126.4	6.93	4.05	21.48	5.02	1.96	1.18	3.16	68.23	4.96	172.2
92.4	6.31	2.45	22.86	4.61	0.63	1.5	2.31	62.33	4.26	147.42
95.6	4.21	2.09	24.91	4.64	0.63	1.47	2.39	51.18	4.74	147.51
78	6.42	2.75	25.76	3.03	0.64	0.61	1.95	77.8	5.03	147.42
72	7.77	5.08	28.08	3.07	0.73	0.85	1.8	101.72	5.15	147.42
83.6	3.56	1.79	28.73	3.8	0.74	1.3	2.09	35.44	4.59	137.99
120.4	4.02	2.32	23.15	4.97	0.76	1	3.01	37.18	4.99	138.52
72	4.03	2.35	21.91	4.4	0.77	1.82	1.8	44.14	5.6	138.61
93.2	5.82	2.58	24.49	3.87	0.78	1	2.33	61.46	5.03	143.28
91.6	5.96	2.81	25.95	4.4	0.8	1.3	2.29	63.12	5.48	144.6
118.4	6.67	4.11	28.34	4.88	0.83	1.3	2.96	63.48	5.09	146.01
95.2	5.02	2.89	29.38	3.87	0.85	1.23	2.38	64.82	5.7	60.68
140.8	6.12	3.59	27.46	5.44	0.86	1.28	3.52	65.18	5.08	147.33
110.4	5.3	2.49	28.41	4.74	0.87	1.63	2.76	59.72	4.96	75.4
106.8	6.89	2.99	28.41	4.86	0.87	1.4	2.67	73.09	5.51	140.55
84	6.05	4.78	28.73	2.84	0.88	0.57	2.1	73.13	6.33	140.55
93.2	6.62	4.45	26.37	3.53	0.88	1	2.33	74.95	5.05	141.96
86	7.55	5.78	25.95	3.67	0.88	1.02	2.15	75.42	5.87	143.28
111.6	4.44	3.15	26.3	4.82	0.88	1.4	2.79	49.72	5.37	60.68
127.6	3.93	2.46	24.82	4.85	0.89	1.27	3.19	45.21	6.23	140.55
124.8	8.04	4.21	23.15	5.49	0.89	1.19	3.12	77.68	6.16	147.42
114	3.96	2.26	20.52	4.54	0.9	1.02	2.85	45.52	10.34	141.96
94	6.33	3.49	20.83	4.06	0.93	1.1	2.35	77.92	4.55	140.55
124.8	4.55	2.72	27.46	5.14	0.96	1.2	3.12	49	4.75	60.59
74	5.2	2.18	25.66	3.19	0.97	0.84	1.85	59.96	5.39	76.9
80.4	4.72	2.29	22.86	4.5	0.97	1.68	2.01	48.45	5.78	64.55
122	7.45	3.72	22.86	4.8	0.98	1.21	3.05	86.06	5.11	151.3
124.8	3.96	2.27	23.67	4.85	1.01	1.24	3.12	45.52	5.05	52.39
131.6	5.66	2.46	23.67	5.21	1.01	1.2	3.29	66.64	5.17	81.13
124.4	5.34	2.42	24.62	5.05	1.02	1.2	3.11	66.88	4.91	81.22
118.8	5.95	3.32	25.66	4.99	1.05	1.51	2.97	67	4.77	82.54
78	6.59	5.58	29.41	3.87	1.07	1.31	1.95	67.12	4.87	82.54
98	4.39	2.11	25.35	4.37	1.1	1.24	2.45	67.2	4.98	82.63
134.4	5.72	3.28	26.33	4.84	1.11	1.2	3.36	67.79	5.1	83.77
134	5.49	2.66	28.73	5.49	1.11	1.32	3.35	68.11	4.79	83.86
69.2	7.42	5.07	25.65	3.34	1.13	1.14	1.73	62.37	5.55	147.51
99.2	4.85	2.41	25.01	4.4	1.13	1.3	2.48	68.26	4.59	85.1
99.6	7.26	5.72	24.16	4.64	1.15	1.3	2.49	84.24	4.93	150.24
66	9.28	6.57	25.1	3.43	1.16	1.32	1.65	85.63	5.59	151.3
108	4.71	2.41	25.8	4.47	1.19	1.35	2.7	47.03	5.43	75.57
114	7.08	3.8	25.69	4.59	1.19	0.94	2.85	87.72	5.57	152.98
126	4.33	2.02	26.83	5.19	1.2	1.21	3.15	78.71	5.18	151.48
146	4.71	2.36	24.69	5.47	1.21	0.92	3.65	79.06	5.25	150.07
128	5.5	2.3	24.15	5.18	1.22	1.28	3.2	79.26	4.84	78.48
67.6	4.89	3.27	24.62	3.19	1.28	1	1.69	79.66	6.81	78.57
114.4	5.27	2.68	23.67	4.82	1.34	1.06	2.86	79.93	5.67	78.75
121.2	5.3	3.29	24.82	5.06	1.37	1.2	3.03	81.71	4.92	77.07
81.2	5.97	4.1	25.47	3.78	1.39	1	2.03	71.27	5.21	111.28
72.4	6.55	5.01	25.5	3.33	1.45	0.9	1.81	71.31	5.2	118.07
109.2	5.84	2.66	20.06	4.57	1.47	0.93	2.73	71.9	5.29	118.07
128	7.19	5.19	20.83	4.78	1.52	0.92	3.2	71.9	4.83	119.48
92	6.27	3.94	25.66	3.82	1.57	1.02	2.3	72.42	5.56	120.27
134	7.04	4.92	26.83	4.93	1.58	0.9	3.35	72.54	8.45	122.65
96.4	6.21	3.66	27.76	4.22	1.65	1.08	2.41	72.58	4.05	123.53
100.8	4.85	2.74	27.76	4.3	1.69	0.87	2.52	83.53	6.15	150.16
142	4.91	3.37	29.73	5.46	1.78	1.3	3.55	83.97	6.65	77.07
100	8.37	6.04	29.73	4.21	1.82	1.08	2.5	72.62	5.16	145.04
125.6	6.09	3.4	26.23	4.73	1.83	1.05	3.14	72.65	5.16	150.77
182.4	6.33	4.05	24.84	6.99	1.86	1.42	4.56	107.18	4.96	104.23
74	6.04	2.5	18.65	3.75	1.77	1.3	1.85	107.18	5.17	104.23
100.4	7.27	4.62	19.71	5.89	3.14	1.14	2.51	107.78	5.91	138.96
134	5.24	3.33	19.72	5.31	2.01	1.21	3.35	83.49	6.82	64.55
131.2	6.09	4.07	20.08	5.52	3.48	1.25	3.28	87.92	5.49	50.98
132.8	8.29	5.51	21.05	5.39	2.26	1.25	3.32	140.56	5.93	154.21
90	8.98	6.82	21.11	4.41	6.53	1.13	2.25	142.22	5.95	155.62
194	6	3.4	21.64	7.12	1.78	1.26	4.85	89.35	4.6	81.13
41.2	10.11	7.35	21.89	4.66	1	3.08	1.03	217.72	7.01	220.15
87.2	7.11	5.87	22.06	3.61	1.11	0.65	2.18	89.7	7.58	123.53
130	5.19	2.73	22.1	5.05	2.25	1.04	3.25	90.49	4.89	83.86
51.6	10.11	6.13	22.15	5.24	1.11	3.35	1.29	231.45	6.39	222
94.4	4.7	3.22	22.38	3.77	1.16	0.92	2.36	40.62	5.62	57.94
41.2	5.85	3.56	22.48	5.2	1.31	1.45	1.03	83.81	5.93	92.15
82.8	6.55	3.47	22.49	3.49	1.67	0.91	2.07	112.13	6.03	125.74
78	6.06	4.18	22.76	3.67	2.15	1.24	1.95	110.62	5.15	92.76
152.4	5.83	2.59	23.63	5.9	1.95	1.25	3.81	86.81	5.92	92.76
106	6.34	2.7	23.83	4.68	2.82	1.21	2.65	124.62	5.59	81.13
40	3.23	1.42	23.92	3.27	0.96	1.72	1	28.24	5.17	58.03
210.4	5.77	3.16	24.01	7.45	2.06	1.22	5.26	108.45	6.5	83.77
45.2	6.37	4.38	24.14	4.43	1.22	2.64	1.13	109.04	4.46	122.47
39.2	8.78	4.35	24.57	6.11	1.03	3.05	0.98	130.28	5.23	154.3
102.8	5.38	3.03	24.57	5.2	2.91	1.38	2.57	84.84	5.82	120.01
36.4	6.98	4.41	24.92	5.17	0.95	1.34	0.91	125.65	5.25	190.18
150	7.08	4.1	24.92	5.99	2.33	1.3	3.75	126.96	5.55	191.68
148	4.73	2.46	25.04	5.7	2.16	1.21	3.7	45.52	5.53	71.78
39.2	7.84	5.12	25.25	5.58	0.95	1.8	0.98	127.55	5.26	159.68
140.8	5.09	2.8	25.28	5.32	2.15	1.05	3.52	127.99	5.01	146.19
42.4	11.62	6.62	25.43	5.12	1.15	3.12	1.06	224.17	4.53	222
133.2	5.71	3.49	25.5	5.08	1.15	3.11	3.33	130.08	5.19	88.09
163.6	7.79	4.09	25.65	6.43	2.54	1.26	4.09	132.18	5.18	158.35
100.8	9.04	6.61	25.95	5.39	1.62	1.43	2.52	161.64	5.19	158.44
123.2	12.14	7.32	26.11	5.59	1.94	1.55	3.08	230.1	4.88	225.18
146	6.24	3.13	26.22	6.2	2.24	1.49	3.65	112.05	5.2	103.34
36.4	3.95	1.7	26.23	5.52	0.92	1.75	0.91	34.57	5.8	135.61
80	5.24	2.53	26.37	3.65	0.98	1.03	2	68.11	5.86	65.35
87.2	9.29	4.22	26.37	5.09	1.02	3.16	2.18	131.94	5.13	130.06
58.8	5.99	3.66	26.37	2.86	0.81	1.02	1.47	92.55	5.32	104.84
138.4	6.12	2.63	26.44	5.58	1.79	1.05	3.46	93.06	5.65	105.28
40.4	7.89	4.76	26.62	5.21	1.02	1.35	1.01	128.82	5.54	156.94
29.6	9.88	6.73	26.64	4.77	0.76	2.71	0.74	174.85	5.36	189.56
52.8	6.85	3.63	26.64	4.69	0.94	3.01	1.32	93.93	5.53	138.96
111.2	6.05	3.29	26.7	5.28	0.97	1.52	2.78	94.96	6.23	112.16
142.4	6.75	4.17	26.83	5.39	1.17	1.02	3.56	94.96	9.03	138.96
80.8	5.75	3.41	26.99	3.51	1.32	0.94	2.02	95.24	5.54	108.63
169.2	4.43	2.44	26.99	6.57	2.88	1.33	4.23	39.51	6.63	48.77
162	6.84	4.45	27.04	4.58	0.91	2.7	4.05	113.91	4.78	138.78
98	4.27	1.91	27.24	4.74	2.59	1.36	2.45	40.11	6.3	52.39
158	7.16	5.27	27.34	5.86	1.48	0.89	3.95	112.64	5.97	138.17
40	6.29	3.77	27.64	3.39	1.05	1.91	1	113.23	5.88	111.28
129.2	9.71	5.33	27.76	3.33	0.91	2.07	3.23	178.02	4.96	135.7
76.8	9.38	5.71	27.77	3.44	0.93	1.12	1.92	180.63		137.2
140.8	5.09	2.8	28.31	5.32	2.15	1.05	3.52	71.9	5.01	65
45.6	7.21	4.7	28.41	6.36	1.26	1.22	1.14	124.62	6.12	140.19
38.8	7.38	3.71	28.44	6.6	1.03	1.45	0.97	175.17	5.07	140.55
35.2	6.06	3.34	28.48	3.87	0.98	2.3	0.88	111.45	4.74	114.89
130	7.16	3.97	28.58	5.2	3.29	1.2	3.25	111.97	6.04	141.52
35.6	4.31	3	28.65	4.51	0.8	1.71	0.89	46.12	5.52	142.75
32.8	6.84	4.45	28.73	2.91	0.84	1.51	0.82	123.32	4.78	144.16
34.8	5.71	3.63	28.73	4.4	0.92	2.61	0.87	124.39	5.5	144.69
46.8	5.48	3.07	28.84	6.27	1.6	1.16	1.17	72.62	5.42	144.78
129.6	5.21	3.04	28.93	5.15	1.98	1.12	3.24	72.89	6.93	146.1
108	6.64	4.72	29.07	4.36	1.94	1.08	2.7	114.5	4.37	146.36
52.8	6.85	3.63	25.69	4.69	0.94	3.01	1.32	114.97	5.53	133.23
70	7.3	3.56	25.69	3.99	2.76	1.1	1.75	117.23	5.39	135.35
38	6.09	2.92	22.32	5.56	1	1.75	0.95	118.34	4.63	118.07
34	5.16	3.02	25.99	4.16	0.89	2.5	0.85	80.09	7.3	68.96
36.8	8.33	5.38	29.41	4.41	0.97	2.6	0.92	135.1	5.08	159.85
34	4.55	2.85	29.41	5.23	0.97	3.43	0.85	46.16	4.85	60.76
110	8.26	5.47	29.41	4.66	1.92	1.21	2.75	135.93	5.2	165.23
37.2	6.95	3.78	29.72	3.76	0.88	1.9	0.93	118.41	10.07	132.08
48.4	9.71	5.33	29.75	5.34	1.1	1.45	1.21	134.35	4.96	167.79
160.4	7.05	5.22	30.08	6.78	1.25	1.4	4.01	118.53	6.23	131.29
43.2	6.21	3.32	26.7	5.18	1.21	3.06	1.08	119.01	6.48	118.07
29.6	4.05	1.84	26.64	2.36	0.8	1.19	0.74	64.74	5.44	145.4
37.2	6.53	4.21	26.57	4.63	0.95	1.03	0.93	119.13	6.42	128.73
39.2	6.77	3.58	24.07	5.49	1.01	1.35	0.98	120.04	8.93	140.55
46	7.97	5.06	23.66	4.02	0.89	2.63	1.15	120.83	5.63	147.42
124.8	6.83	3.68	30.44	4.85	1.64	1	3.12	121.66	4.63	126.53
34.8	6.25	2.94	26.99	5.93	2.99	1.77	0.87	123.04	5.58	126.79
35.6	7.65	4.9	26.99	4.33	2.88	2.64	0.89	123.32	5.07	126.97
58.8	4.68	2.97	30.47	6.64	1.6	1.92	1.47	54.86	5.02	56.44
35.2	7.36	3.44	27.43	4.36	2.99	2.58	0.88	133.96	8.32	154.12
120.8	9.71	5.33	27.38	3.33	2.91	2.07	3.02	136.29	4.96	194.85
110.4	5.9	2.74	27.38	5.16	2.72	1.17	2.76	101.01	4.23	119.3
78	4.91	2.63	30.86	3.81	2.73	1.26	1.95	51.73	5.34	60.85
102.8	8.48	6.44	30.86	5.13	2.77	1.23	2.57	137.24	5.34	161.09
134	7.18	2.79	25.54	5.31	1.23	1.27	3.35	138.47	5.74	148.83
108	5.81	3.52	28.73	4.38	1.02	0.97	2.7	105.52	4.61	75.4
114.8	8.28	5.06	28.73	3.76	2.94	1.32	2.87	185.77	5.41	150.42
41.2	5.76	2.73	28.73	5.52	1.09	1.7	1.03	111.06	9.37	77.07
119.2	8.09	3.73	28.09	5.6	3	1.65	2.98	208.35	5.59	166.99
58.8	4.6	2.34	25.35	6.86	2.81	1.02	1.47	40.5	5.67	63.5
74	4.11	1.55	27.04	3.13	2.11	0.83	1.85	38.72	6.59	57.41
161.2	3.92	2.81	27.68	6.78	2.04	1.95	4.03	35.4	4.96	135.61
114	8.2	3.4	25.95	4.63	3.49	1.02	2.85	138.62	4.99	152.89
95.2	8.59	5.02	32.05	4.43	2.4	1.3	2.38	138.82	6.67	173.25
159.2	6.35	3.73	32.11	5.82	1.24	1.85	3.98	111.18	4.61	119.48
158.4	9.85	5.78	32.44	4.27	2.92	1.68	3.96	189.17	4.38	206.22
156.8	9	5.73	29.07	5.77	4.06	1.08	3.92	133.44	5.36	178.54
40.8	5.27	3.05	32.46	5.92	4.13	1.95	1.02	76.41	8.53	74.6
190.8	8.4	6.68	32.65	6.14	2.81	1.83	4.77	132.57	6.87	185.33
114	5.24	3.25	30.45	5.33	5.04	1.6	2.85	82.7	6.09	74.6
44.8	7.84	4.88	27.04	6.9	3.32	2.04	1.12	130.87	4.93	150.24
199.2	4.43	3.68	30.48	4.9	2.98	1.03	4.98	83.81	5.37	52.74
124.8	5.56	2.9	33.3	5.52	1.24	1.54	3.12	85.47	5.15	64.11
111.6	5.85	3.35	33.71	6.97	4.93	1.1	2.79	109.71	6.64	64.2
140	8.02	4.43	30.42	5.01	3.58	1.3	3.5	132.26	5.13	188.86
163.6	4.8	3.7	30.78	6.87	2.02	2.27	4.09	67.12	4.8	62.26
182.8	4.97	2.48	26.85	7.8	4.2	1.75	4.57	67.51	5.52	62.88
43.6	4.8	3.7	29.41	6.87	3.02	2.27	1.09	76.41	4.8	62
186	9.31	7.21	30.8	5.2	2.66	0.93	4.65	139.61	5.94	214.33
179.6	5.93	3.76	31.83	6.12	1.64	0.9	4.49	110.54	5.38	63.58
77.2	4.8	2.96	26.04	3.45	0.69	1.05	1.93	81.08	6.8	151.48
122.4	5.34	2.41	19.81	5.02	4.23	0.94	3.06	83.41	8.29	151.65
72.8	13.94	11.56	20.2	3.04	1.85	0.65	1.82	173.9	7.37	165.85
88	7.86	5.04	20.99	3.44	0.72	0.78	2.2	156.15	7.58	119.56
104.8	9.91	6.74	21.34	4.12	2.05	0.87	2.62	156.3	7.8	120.01
147.6	5.51	3.04	21.48	5.79	2.14	1	3.69	85.11	7.23	162.5
69.2	15.72	12.04	21.64	2.94	1.31	0.83	1.73	175.17	7.82	166.38
114	7.3	3.79	21.67	4.61	1.69	1.02	2.85	109	9.39	167.88
156.8	5.42	3.83	21.88	5.89	1.5	1.32	3.92	85.71	8.85	151.74
122.8	7.94	3.75	22.1	5.42	4.33	1.11	3.07	108.45	5.84	108.9
146	6.07	3.72	22.43	5.34	1.91	0.93	3.65	109	6.63	165.23
73.2	15.72	12.04	22.66	3.21	3.3	0.79	1.83	175.84	7.82	166.64
106	5.93	3.35	22.66	4.77	1.49	1.34	2.65	105.32	7.46	153.15
117.6	7.63	4.61	22.77	4.74	0.83	1.1	2.94	107.78	10.4	176.25
138.4	5.92	3.27	22.86	6.22	1.73	1.7	3.46	92.55	6.82	155.62
129.2	10.58	8.83	22.86	7.12	2.87	1.23	3.23	177.11	4.98	166.99
71.6	6.67	3.26	23.04	4.11	2.21	1.37	1.79	110.78	5.51	177.31
133.2	16.24	14.27	23.05	3.7	0.7	1.22	3.33	177.11	6.9	176.25
158.4	7.66	4.58	23.62	6.34	1.6	1.31	3.96	151.75	7.51	108.63
221.6	7.18	3.4	23.66	5.54	2.45	1.43	5.54	153.22	11.2	108.9
227.2	3.88	1.84	23.67	7.65	1.78	0.9	5.68	67	8.73	75.4
115.2	3.87	2.54	23.67	5.02	2.18	1.3	2.88	69.49	5.96	84.04
143.6	5.71	3.38	23.83	6.9	2.82	1.65	3.59	105.96	5.49	156.06
114.4	3.99	2.06	23.88	4.46	2.31	0.82	2.86	67	10.07	120.27
102.4	4.68	2.21	23.88	3.93	3.4	0.83	2.56	74.99	7.81	150.42
136.8	6.61	4.05	23.88	5.16	0.71	1	3.42	111.06	7.94	167.96
78	8.08	4.91	23.94	3.45	2.25	0.82	1.95	111.18	7.31	169.37
137.6	7.03	4.37	23.99	5.19	2.13	0.87	3.44	111.45	14.51	170.7
128	7.53	3.69	24.14	5.29	3.2	1.14	3.2	112.05	7.93	170.78
122	10.65	7.21	24.22	5.49	1.6	1.37	3.05	183.39	4.15	151.48
102	4.88	3.02	24.26	5.32	1.06	1.84	2.55	73.09	10.74	124.33
146	8.6	5.85	24.44	5.65	3.71	1.03	3.65	73.76	12.26	150.33
116.4	6.53	3.92	24.49	4.81	2.31	1.21	2.91	110.23	9.92	139.14
173.2	8.09	4.61	24.61	6.42	6.19	0.97	4.33	159.19	8.6	150.42
78	4.86	2.7	24.61	4.06	0.91	1.41	1.95	109.04	6.24	230.12
146	8.65	5.67	24.62	5.63	2.18	1.1	3.65	157.96	14.82	152.71
106.4	6.62	3.95	24.69	5.18	1.76	1.6	2.66	109	8.36	143.28
135.2	5.55	3.18	24.77	5.47	3.24	0.94	3.38	105.96	15.84	150.16
78	6.01	3.57	24.77	3.33	1.23	1.01	1.95	105.96	7.03	165.32
61.6	4.35	2.07	24.93	3.52	0.86	1.37	1.54	72.58	5.08	231.44
93.2	7.05	4.44	25.06	3.85	0.9	1.01	2.33	112.13	8.1	170.78
124.8	7.44	4.4	25.06	4.84	1.93	1.05	3.12	112.44	6.97	172.02
126.4	10.3	6.14	25.08	5.41	1.87	1.31	3.16	113.23	4.4	172.55
230	11.53	8.12	25.1	14.19	15.69	5.87	5.75	113.91	13	173.78
110	5.67	2.14	25.31	4.77	1.09	1.21	2.75	114.54	6.56	175.19
100.8	7.67	3.58	25.35	4.04	3.16	0.87	2.52	115.76	7.8	175.28
74	8.52	4.77	25.39	3.29	2.57	1.02	1.85	133.48	9.61	230.12
142.4	7.42	3.89	25.39	5.38	2.96	0.91	3.56	137.24	8.37	144.6
80.4	7.9	5.43	25.39	4.05	1.51	1.1	2.01	139.61	6.45	144.6
100	7.15	4.35	25.43	4.06	1.48	0.94	2.5	142.22	11.29	146.1
73.6	9.31	6.51	25.69	3.32	0.93	1.05	1.84	146.3	6.62	234.35
164	7.22	3.72	25.71	6.69	2.36	1.6	4.1	150.37	9.05	147.42
88	8.09	4.13	25.71	4.51	3.13	0.87	2.2	151.75	6.31	147.42
124.8	4.94	2.1	25.76	5.23	2.32	1.34	3.12	107.78	9.9	125.38
114	8.11	5.02	25.78	4.67	2.4	1	2.85	131.78	12.04	123.53
106	7.59	6	25.83	4.36	2.53	0.94	2.65	132.18	5.72	127.15
89.2	7.66	5.7	25.95	3.67	2.18	0.95	2.23	132.57	5.94	140.55
72.8	6.83	3.56	25.95	3.01	1.37	0.75	1.82	155.83	5.43	175.37
76.4	5	2	25.99	3.46	0.93	1.25	1.91	106.55	7.64	162.32
72	5.41	2.93	26.04	3.92	1.38	1.4	1.8	106.59	5.96	162.41
59.2	8.97	6.01	26.3	2.63	1.17	0.89	1.48	156.3	7.49	150.07
212.4	4.76	2.81	26.37	7.64	2.17	1.44	5.31	72.54	5.82	140.55
154	6.63	4.22	26.37	5.63	1.9	1.02	3.85	155.83	7.44	165.32
138.4	5.07	2.33	26.51	5.61	1.72	1.3	3.46	72.58	5.37	166.11
158	9.99	6.41	26.57	5.95	2.85	1.02	3.95	117.35	8.57	238.23
131.6	7.99	5.76	26.84	5.34	4.03	0.85	3.29	117.35	9.63	166.11
91.2	6.52	3.3	26.95	5.75	1.96	0.9	2.28	118.53	8.64	166.91
112	6.72	4.22	27.06	5.01	1.65	1.4	2.8	121.66	9.82	177.84
62.8	6.39	3.72	27.14	5.11	2.17	0.85	1.57	125.02	6.71	166.11
180	10.19	5.22	27.34	6.63	1.74	1.23	4.5	161.64	15.77	157.38
100	8.95	5.73	27.34	5.69	3.51	1.35	2.5	164.21	8.45	157.74
126.4	7.56	4.24	27.68	5.46	4.77	1.21	3.16	166.27	4.82	159.85
140	8.17	4.43	27.77	5.56	2.34	1.18	3.5	166.27	7.34	161.88
129.2	9.98	6.32	28.03	5.36	1.24	1.28	3.23	167.1	9.8	163.73
123.6	9.74	7.53	28.08	5.05	3.88	1.31	3.09	167.1	9.13	165.23
53.2	5.23	3.16	28.09	2.45	1.54	0.86	1.33	106.75	9.98	157.03
107.2	6.85	4.06	28.28	4.7	2.15	1.23	2.68	115.76	8.37	159.24
142.4	5.21	4.3	28.34	5.45	1.21	1.04	3.56	107.06	6.1	159.68
213.6	3.96	2.18	28.37	3.45	2.67	1.32	5.34	69.49	7.8	125.38
91.2	3.89	2.24	28.37	3.44	3.82	0.66	2.28	72.5	9.76	125.38
153.2	6.73	3.21	28.58	5.67	3.37	1.03	3.83	128.82	6.89	178.72
147.2	6.86	3.85	28.74	5.49	2.76	1	3.68	130.04	6.1	235.58
126	8.98	4.93	29.39	4.97	3.48	1.09	3.15	130.16	7.47	147.51
64	5.38	2.93	29.41	3.13	3.13	1.07	1.6	107.18	6.06	165.05
118.4	6.91	3.48	29.73	4.7	2.48	1.02	2.96	128.1	5.22	165.23
128	4.55	2.77	30.11	5.18	3.14	1.24	3.2	74.95	11.18	161.18
123.6	7.22	4.53	31.25	4.46	3.75	1.09	3.09	127.99	8.2	185.33
76.8	5.74	3.23	32.05	3.46	3.61	1.02	1.92	107.18	8.65	161.18
180	10.19	5.22	35.25	6.63	1.74	1.23	4.5	183.47	15.77	157.21
114	8.78	4.79	35.38	5.12	2.97	1.24	2.85	130.99	7.47	195.38

## Sheet: Glucose-Age-Platelet
Glucose	control	Mild	Moderate	Severe	Age	control	Mild	Moderate	Severe	Platelet	control	Mild	Moderate	Severe
	6.45	5.4	5.5	4.38		60	61	80	81		158	258	150	250
	6.12	5.71	4.96	13		63	48	44	42		173	271	283	325
	9.61	5.75	5.72	8.29		64	62	56	68		291	307	123	167
	5.4	4.46	5.92	4.89		55	75	61	65		228	210	319	153
	5.34	5.18	5.64	10.12		53	60	69	65		215	218	155	159
	8.37	5.82	4.4	5.13		70	58	65	59		186	209	189	342
	6.93	5.6	6.39	5.24		63	62	60	57		230	175	195	312
	5.24	7.62	5.19	7.82		59	54	69	71		184	201	208	560
	5.81	5.56	6.07	7.82		66	62	53	71		198	241	308	560
	5.34	5.59	5.57	7.46		74	65	75	55		145	273	336	207
	6.03	6.12	4.38	10.4		34	42	67	62		301	369	277	250
	5.52	4.9	5.53	9.82		80	63	65	63		150	290	221	268
	5.46	4.69	5.93	5.96		58	60	66	66		218	214	288	254
	6.51	4.99	7.01	6.89		38	54	68	58		251	218	400	205
	5.51	5.99	5.07	15.77		61	57	63	63		320	218	211	296
	9.92	5.51	6	15.77		71	58	79	63		332	246	204	296
	4.88	5.77	6.78	4.6		83	52	70	74		283	261	249	262
	5.13	4.92	5.65	4.63		44	68	59	69		303	241	238	256
	4.71	5.48	5.21	4.85		55	58	70	62		190	217	222	212
	5.17	5.29	5.12	6.63		46	58	46	66		251	214	349	242
	5.35	5.29	5.53	5.56		52	58	61	59		241	214	238	297
	4.83	5.01	5.03	4.96		76	62	51	51		153	303	276	264
	5.64	4.84	5.28	6.5		55	48	57	71		204	239	240	308
	5.95	5.01	6.57	5.15		83	62	65	58		173	303	288	257
	5.04	5.42	5.38	8.98		58	58	53	59		262	288	307	257
	4.96	6.72	5.25	5.65		48	61	54	58		291	276	226	331
	5.05	5.91	5.35	6.73		34	61	73	70		284	155	170	149
	4.96	5.68	5.31	6.44		55	59	68	66		213	307	344	354
	4.62	4.84	5.7	5.25		30	60	66	60		299	178	189	337
	4.8	7.47	4.93	5.69		53	70	56	42		167	210	148	212
	5.47	5.21	7.03	5.72		56	66	58	59		180	145	200	325
	5.19	6.42	6.29	5.69		87	62	60	52		218	209	188	174
	4.59	6.16	5.31	7.44		55	55	60	72		283	219	238	261
	5.01	5.54	4.75	4.78		43	65	49	48		103	235	319	216
	5.08	6.65	5.16	4.78		70	66	62	48		36	209	198	216
	4.94	5.1	4.75	6.29		58	48	49	60		268	263	333	188
	6.97	5.51	7.34	14.51		58	52	58	59		208	293	263	213
	8.36	9.63	5.59	5.94		63	59	65	58		236	200	213	171
	6.09	4.84	5.65	5.09		58	45	61	74		183	190	147	242
	5.53	4.37	4.65	9.92		62	47	54	50		197	253	207	159
	5.89	5.11	4.99	6.31		68	53	67	50		233	266	245	221
	5.08	5.89	10.07	4.61		65	64	57	78		149	147	195	214
	5.08	4.75	15.84	5.83		63	34	56	47		642	171	146	221
	6.23	5.2	5.4	9.37		59	39	65	65		284	221	237	221
	6.03	5.53	6.23	5.13		63	49	77	52		168	261	193	177
	4.33	5.08	5.63	4.99		83	56	39	59		324	404	158	217
	5.43	8.32	4.74	5.36		91	44	63	59		149	191	192	339
	5.67	5.17	5.58	4.58		64	76	46	70		164	177	258	180
	5.25	6.63	10.11	6.48		57	71	41	62		166	223	195	189
	5.43	4.77	4.72	5.55		38	62	52	62		218	167	217	230
	4.55	5.53	5.62	5.86		32	49	62	63		182	261	171	158
	5.03	4.59	5.29	6.81		45	54	71	64		169	225	183	170
	5.6	4.55	5.09	5.14		58	39	42	67		240	312	215	262
	5.03	5.14	5.36	4.91		57	54	65	59		233	185	249	221
	5.06	8.1	5.13	4.8		73	59	62	77		91	205	229	219
		7.41	4.96				52	84				233	58
			4.61					61					236
			4.81					44					283
			5.72					51					364
			5.56					51					200
			10.34					58					240
			5.57					66					231
			9.06					55					187
	5.66491	5.67393	5.92571	6.84127		59.4	57.0714	60.3175	61.6		222.145	235.518	230.778	249.927
	1.12974	1.03085	1.78276	2.74234		13.7889	8.6673	9.72828	8.63799		84.5091	51.8585	63.6303	82.2063

## Sheet: TC-TG-HDL-LDL
TC	control	Mild	Moderate	Severe	TG	control	Mild	Moderate	Severe	HDL	control	Mild	Moderate	Severe	LDL	control	Mild	Moderate	Severe
	4.76	4.06	4.82	4.32		0.51	1.28	1.69	1.79		1.6	1.41	1.18	1.05		2.35	2.01	3.16	2.48
	4.42	4.84	5.02	4.19		1.28	1.74	1.96	2.69		1.3	1.23	0.94	3.87		2.26	3.02	2.65	5.75
	3.29	5.26	4.36	5.02		2.57	1.17	2.53	2.23		1.02	1.21	1.25	0.94		1.85	3.15	3.81	3.06
	4.68	4.11	5.9	5.05		2.48	0.68	1.95	2.25		1.09	1.7	1.23	1.04		2.8	1.52	3.16	3.25
	5.47	6.36	5.14	2.85		2.36	1.58	1.18	1.36		0.99	1.34	1.31	1.14		3.6	4.27	3.16	1.35
	4.7	4.62	5.41	7.39		2.15	1.57	1.87	1.38		1.23	1.2	1.11	1.56		2.68	2.65	3.35	4.97
	5.15	6.53	5.24	5.94		1.98	1.58	3.24	4.2		1.12	1.39	1.57	1.12		3.24	4.2	2.52	4.27
	4.64	6.38	4.37	3.21		1.94	1.51	1.05	3.3		0.94	1.7	1.4	0.79		3.07	3.75	4.28	1.83
	4.22	5.22	6.63	2.94		1.78	1.11	1.51	1.31		1.21	1.4	2.07	0.83		2.37	3.19	4.89	1.73
	3.81	4.97	8.18	4.77		1.73	1.77	1.58	1.49		1.26	1.09	0.92	1.34		1.95	3.2	2.68	2.65
	3.78	4.46	4.27	4.74		1.6	1.75	1.93	0.83		1.05	1.09	1.21	1.1		2.18	3.09	3.7	2.94
	4.51	5.28	5.7	5.01		1.47	1.61	2.16	1.65		0.8	1.26	1.25	1.4		2.71	3.3	3.32	2.8
	4.97	6.45	5.39	3.92		1.4	2.33	2.26	1.38		1.3	1.13	1	1.4		2.95	4.37	3.08	1.8
	5.22	6.27	4.66	5.67		1.31	1.59	2.09	1.37		1.06	1.21	1.03	1.03		3.32	4.06	4.45	3.83
	5.4	4.33	6.6	6.63		1.29	1	2.3	1.74		1.52	1.3	1.37	1.23		2.78	2.49	4.21	4.5
	4.65	6.75	6.44	6.63		1.25	3.45	1.3	1.74		1.25	1.08	1.28	1.23		2.61	4.42	3.57	4.5
	4.37	7.34	5.86	7.12		1.21	2.61	1.61	1.78		0.84	1.32	1.05	1.26		2.83	5.12	3.46	4.85
	4.62	5.45	5.58	5.56		1.16	1.69	1.79	1.93		1.41	1.16	1.25	1		2.84	3.49	3.4	3.75
	4.94	5.01	5.41	5.39		1.15	1.48	1.06	1.03		1.4	1.4	1.05	1.7		2.75	2.86	3.34	2.74
	4.81	5.06	5.4	4.57		1.12	2.56	6.21	1.58		1.26	1.02	1.64	1.26		2.69	3.26	4.74	2.63
	3.83	5.06	7.28	5.77		1.12	2.56	1.2	1.45		1.11	1.02	1.9	1.12		2.13	3.26	3.2	3.82
	3.9	5.32	6.08	6.99		1.12	2.15	1.42	1.86		1.32	1.05	1.2	1.42		2.25	3.52	3.06	4.56
	4.26	5.06	4.91	7.45		1.11	1.7	1.28	2.06		1.5	1.21	1.6	1.22		1.96	3.4	2.72	5.26
	5.06	5.32	5.08	5.62		1.07	2.15	0.93	2.53		1.56	1.05	1.3	1.38		2.54	3.52	2.97	3.3
	4.59	6.27	4.86	6.51		1.06	1.82	1	2.33		1.01	1.6	1.21	1.34		2.85	4.16	4.05	4.18
	4.68	3.33	6.04	5.92		0.84	2.96	0.74	1.67		1.47	0.98	1.32	1.21		2.38	1.59	2.06	3.95
	4.17	5.89	3.84	5.29		0.8	3.14	0.75	1.43		1.21	1.14	1.6	1.4		2.36	2.51	1.85	2.96
	4.49	5.21	4.16	4.79		0.75	4.39	0.81	2.28		1.25	0.96	1.08	1.04		2.82	3.14	2.86	3.12
	4.26	5.09	4.67	5.94		0.68	1.04	1.14	1.59		1.51	1.45	1.3	1.13		1.96	2.95	2.49	3.73
	3.87	4.97	4.64	4.66		2.66	1.48	1.15	2.23		1.02	1.09	1.01	1.02		2.27	3.15	1.95	2.76
	4.78	3.78	3.33	7.17		1.19	1.39	1.23	1.48		1.32	1	1.27	1.84		2.77	2.03	2.93	4.86
	5.08	4.63	4.83	3.18		1.09	1.61	1.18	1.7		1.15	0.95	1.06	0.85		3.11	3.03	2.7	1.75
	3.8	5.49	4.59	5.63		0.74	0.89	2.61	1.9		1.3	1.19	1.4	1.02		2.09	3.12	3.32	3.85
	3.65	5.66	5.56	4.58		0.91	1.65	2.75	1.99		0.75	1	1.05	0.91		2.54	3.89	3.14	2.7
	2.41	5.46	4.73	2.91		0.83	1.78	1.83	2.01		0.72	1.3	1.4	0.84		1.45	3.55	3.32	1.51
	3.48	4.84	5.56	4.83		0.7	1.11	2.75	1.18		0.9	1.2	1.18	1.27		2.07	3.36	3.5	2.93
	4.84	4.86	5.56	5.19		1.93	0.87	2.34	2.13		1.05	1.4	1	0.87		3.12	2.67	3.65	3.44
	5.18	5.34	5.6	4.2		1.76	4.03	3.29	1.66		1.6	0.85	0.89	0.93		2.66	3.29	3.04	2.65
	5.33	5.18	4.73	6.61		5.04	1.22	1.32	2.7		1.6	1.28	0.94	1.22		2.85	3.2	3.34	4.2
	4.99	4.36	5.04	4.81		4.16	1.94	1.29	2.31		0.81	1.08	1	1.21		3.06	2.7	3.01	2.91
	5.46	4.8	4.97	4.51		3.52	0.98	0.76	3.13		0.96	1.21	0.82	0.87		3.57	3.05	2.86	2.2
	4.41	4.53	4.46	5.82		2.92	1.13	2.31	1.53		0.97	1.1	0.94	1.24		2.6	2.75	3.38	3.85
	2.32	5.14	5.47	5.85		2.65	0.96	3.24	1.51		0.53	1.2	1.32	0.91		1.45	3.12	3.65	4.08
	4.4	4.66	5.79	5.52		2.31	1.92	1.15	1.52		0.93	1.21	0.97	1.09		2.65	2.75	3.52	3.7
	3.49	4.69	5.28	5.01		1.67	2.29	2.42	1.58		0.91	0.94	0.89	1.3		2.07	3.01	2.63	3.5
	4.28	5.44	4.02	4.63		1.44	0.86	1.51	1.49		0.88	1.28	1.25	1.02		2.6	3.52	2.11	2.85
	3.01	4.36	3.92	4.77		1.37	5.25	1.02	7.86		0.75	0.99	0.99	0.76		1.82	2.58	3.77	2.71
	4.82	5.21	5.93	3.49		1.34	1.01	6.11	0.58		1.06	1.2	0.94	1.21		2.86	3.29	2.02	1.85
	5.47	6.57	3.51	5.18		1.21	2.88	1.32	2.01		0.92	1.33	1.3	1.21		3.65	4.23	3.19	3.06
	4.47	4.99	5.15	3.34		1.19	1.05	0.83	1.13		1.35	1.51	1.01	1.14		2.7	2.97	3.75	1.73
	4.06	4.69	5.51	4.42		0.93	2.29	1.34	1.92		1.1	0.94	0.93	0.94		2.35	3.01	2.73	2.67
	3.87	4.4	4.57	3.19		0.78	1.13	1.47	1.28		1	1.3	1.3	1		2.33	2.48	2.96	1.69
	4.4	3.9	4.88	5.08		0.77	1.93	0.83	2.09		1.82	0.82	1.4	0.89		1.8	2.46	4.47	3.48
	3.03	4.56	6.3	5.05		0.64	1.27	1.24	1.02		0.61	1.45	1.14	1.2		1.95	2.32	3.65	3.11
	2.44	3.85	5.62	4		0.61	0.9	1.4	1.43		0.83	1.01	1.04	0.87		1.22	2.33	1.95	2.54
		3.54	3.78				1.05	2.51				0.87	1.24				2.2	4.44
			6.79					2.91					1.09					3.11
			4.85					3.86					1.28					3.68
			5.67					1.72					1.02					2.3
			3.82					1.57					1.02					2.85
			4.54					0.9					0.94					2.85
			4.59					1.19					0.9					2.48
			4.12					3.25
	4.34527	5.09286	5.15889	5.06964		1.53909	1.80071	1.85937	1.92		1.13509	1.19286	1.18629	1.18509		2.52164	3.13446	3.20065	3.22073
	0.769793	0.834984	0.90963	1.17843		0.89339	0.918275	1.08236	1.0226		0.279801	0.200542	0.24416	0.431388		0.530408	0.705588	0.689556	1.02762

[truncated: 2 more sheets: Multiple regression, NET-risk factors]
